# Supplementary material for: Frequent new particle formation at remote sites in the temperate/boreal forest of North America
Source: Copernicus journal article supplement (doi:10.5194/acp-2021-838), 2021-10-18

NOAA HYSPLIT MODEL  
Backward trajectory ending at 1900 UTC 04 Jun 19  
GDAS Meteorological Data

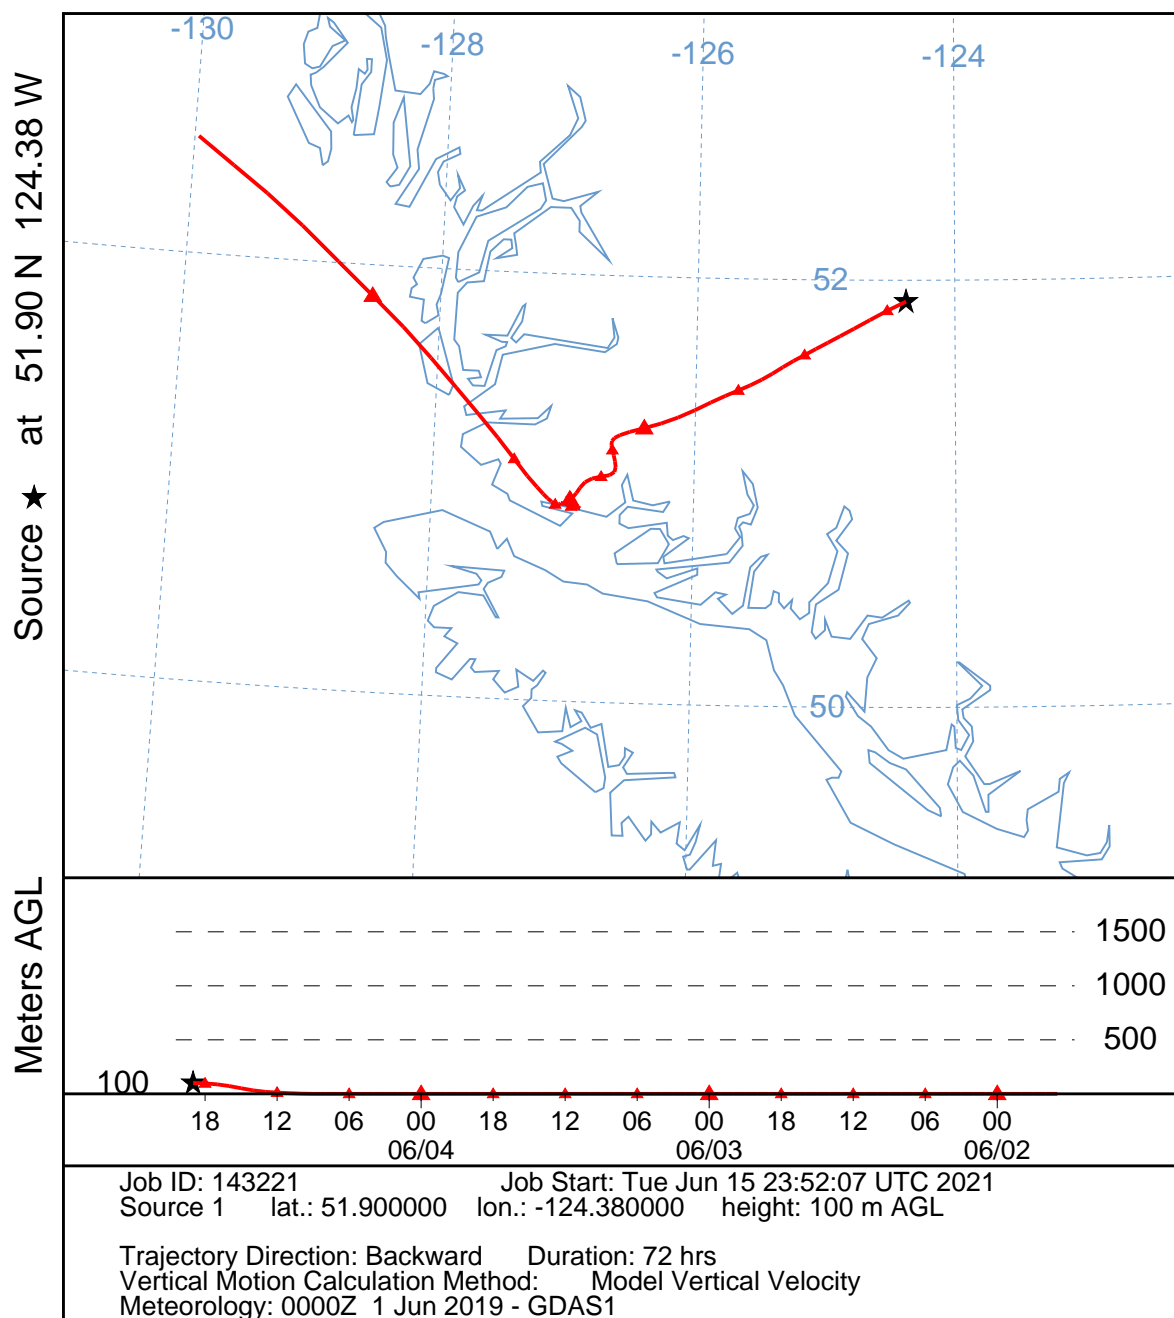

NOAA HYSPLIT MODEL  
Backward trajectory ending at 1900 UTC 05 Jun 19  
GDAS Meteorological Data

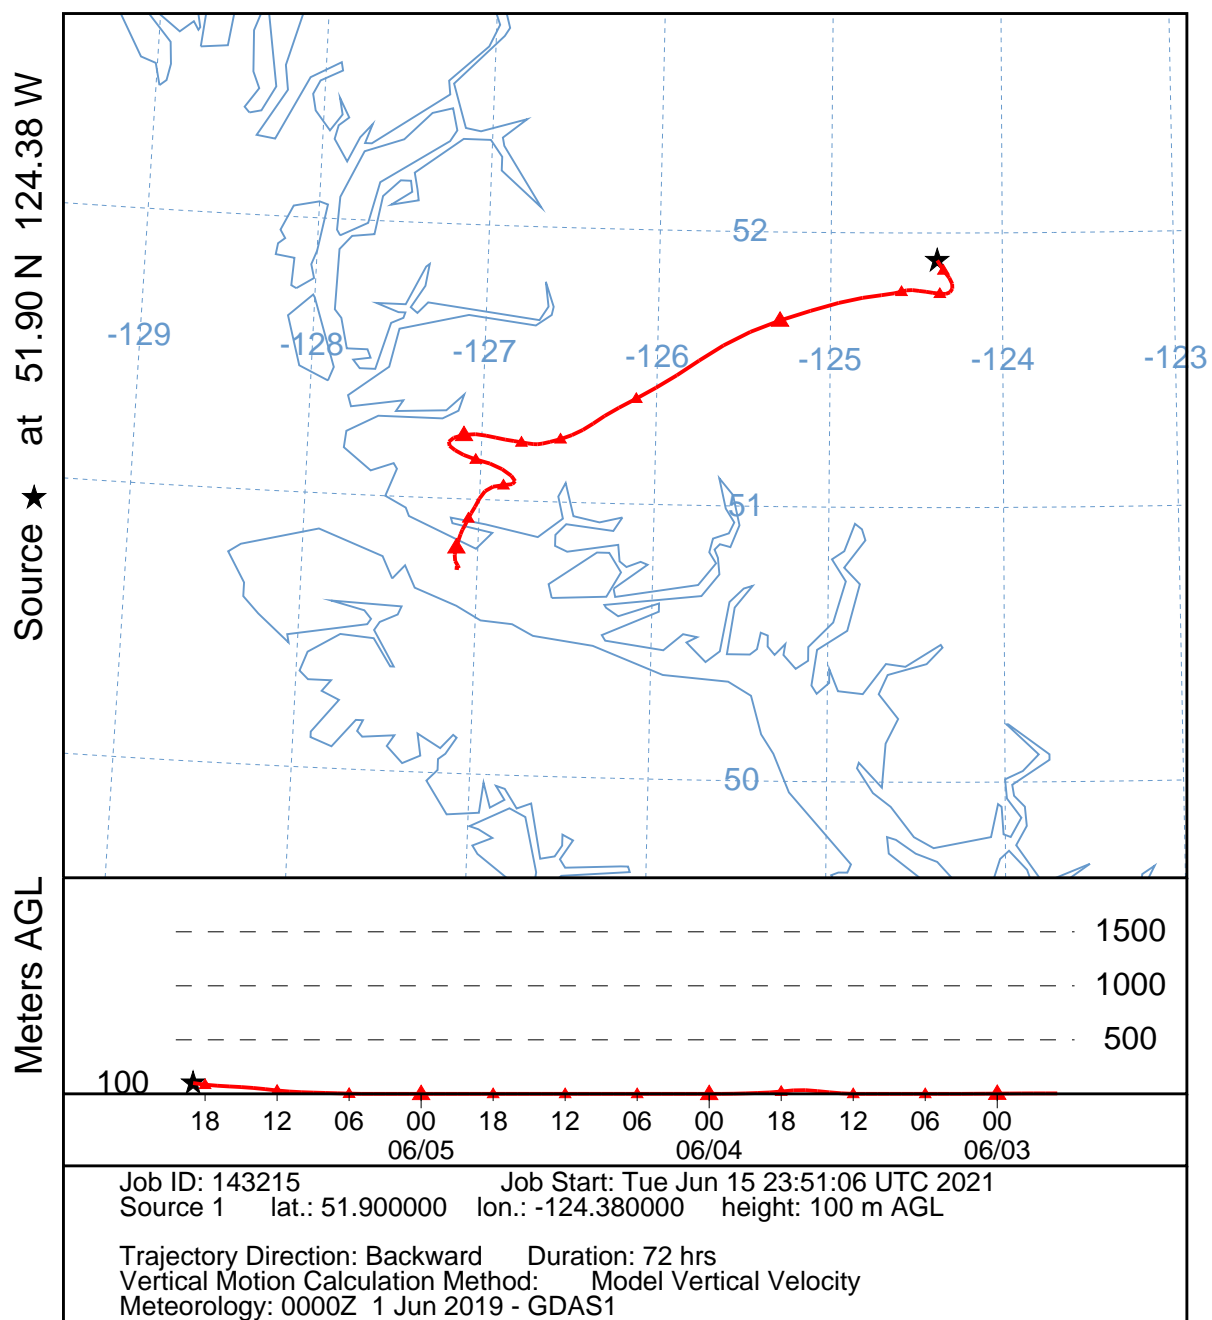

NOAA HYSPLIT MODEL  
Backward trajectory ending at 1900 UTC 06 Jun 19  
GDAS Meteorological Data

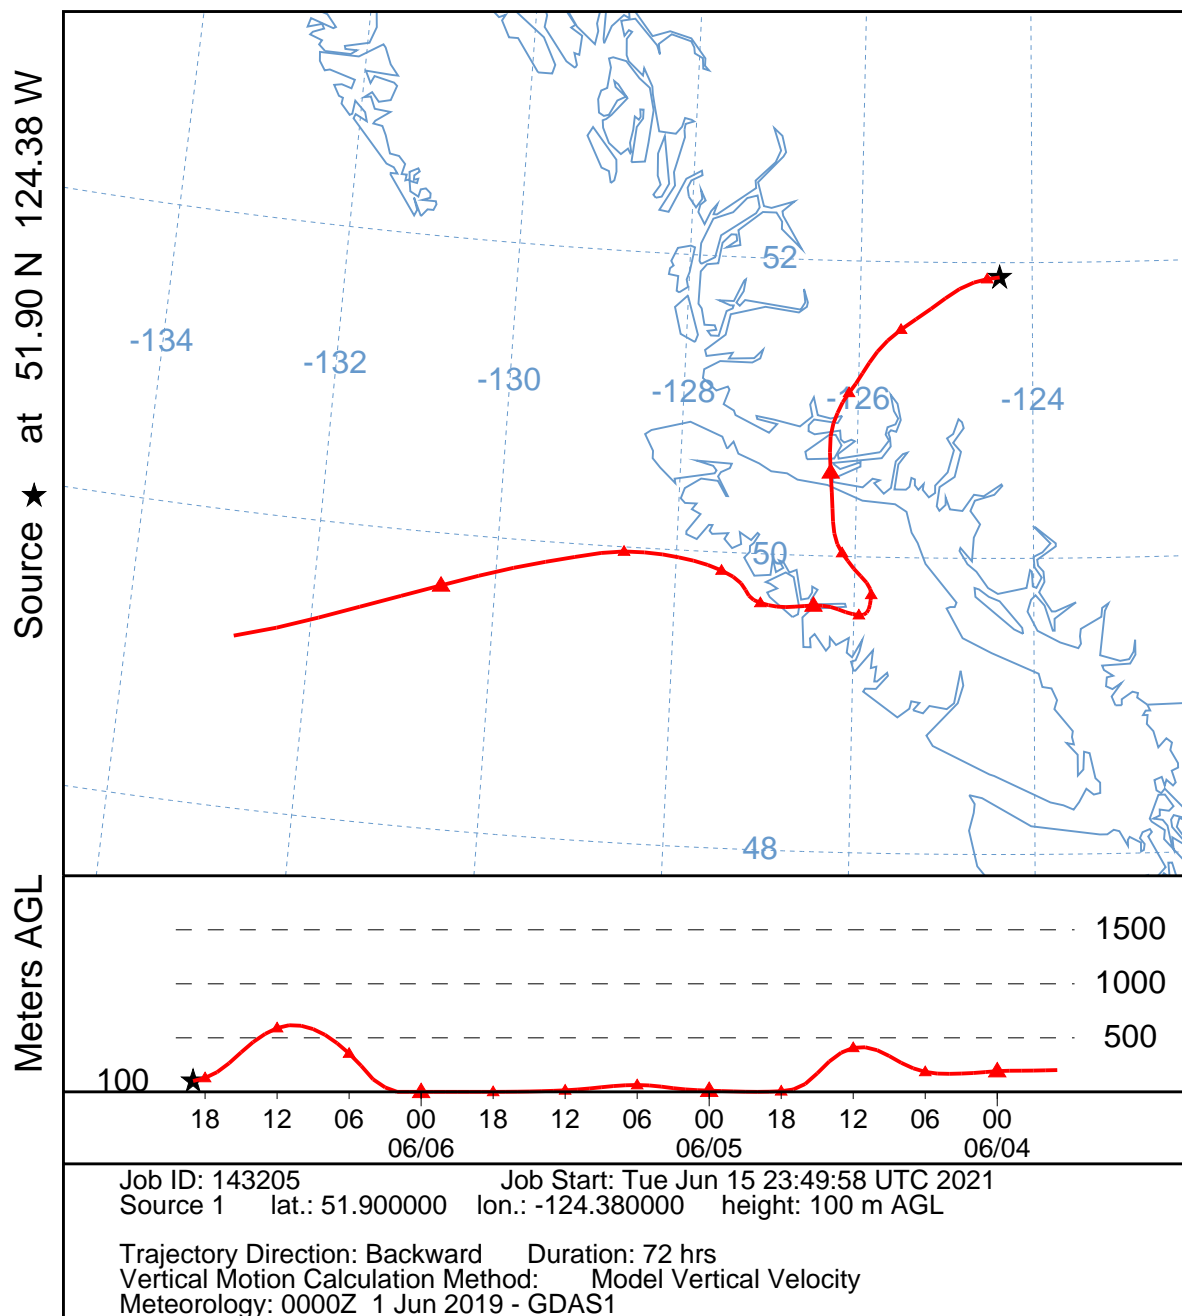

NOAA HYSPLIT MODEL  
Backward trajectory ending at 1900 UTC 07 Jun 19  
GDAS Meteorological Data

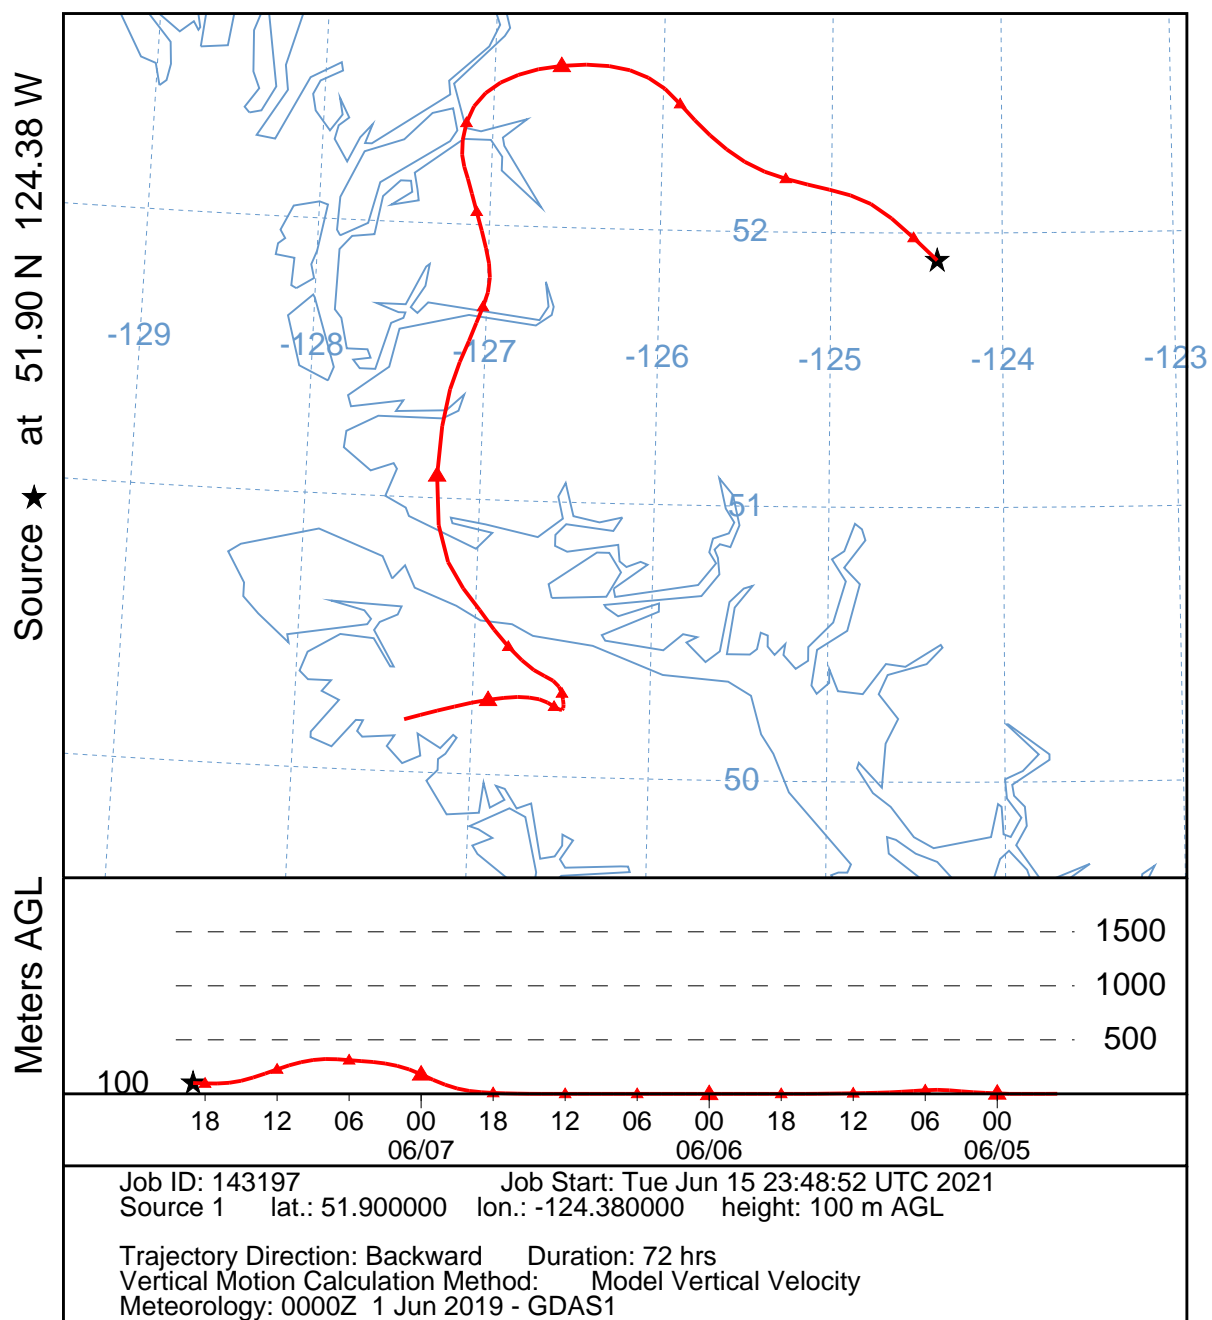

NOAA HYSPLIT MODEL  
Backward trajectory ending at 1900 UTC 08 Jun 19  
GDAS Meteorological Data

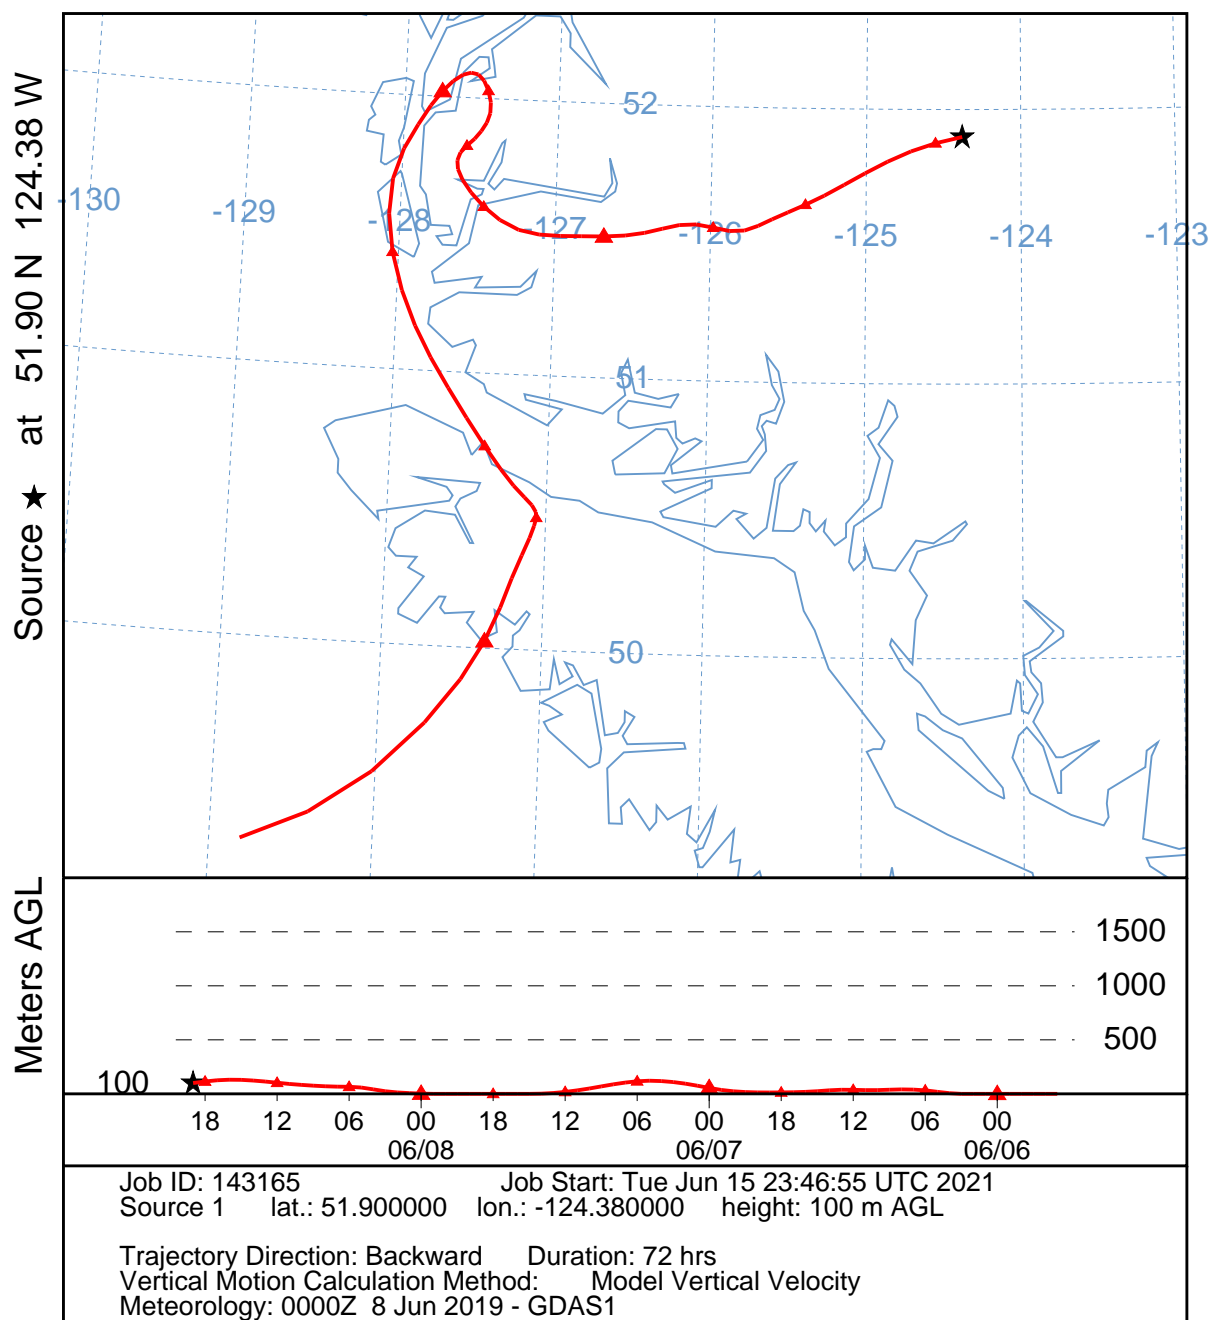

NOAA HYSPLIT MODEL  
Backward trajectory ending at 1900 UTC 09 Jun 19  
GDAS Meteorological Data

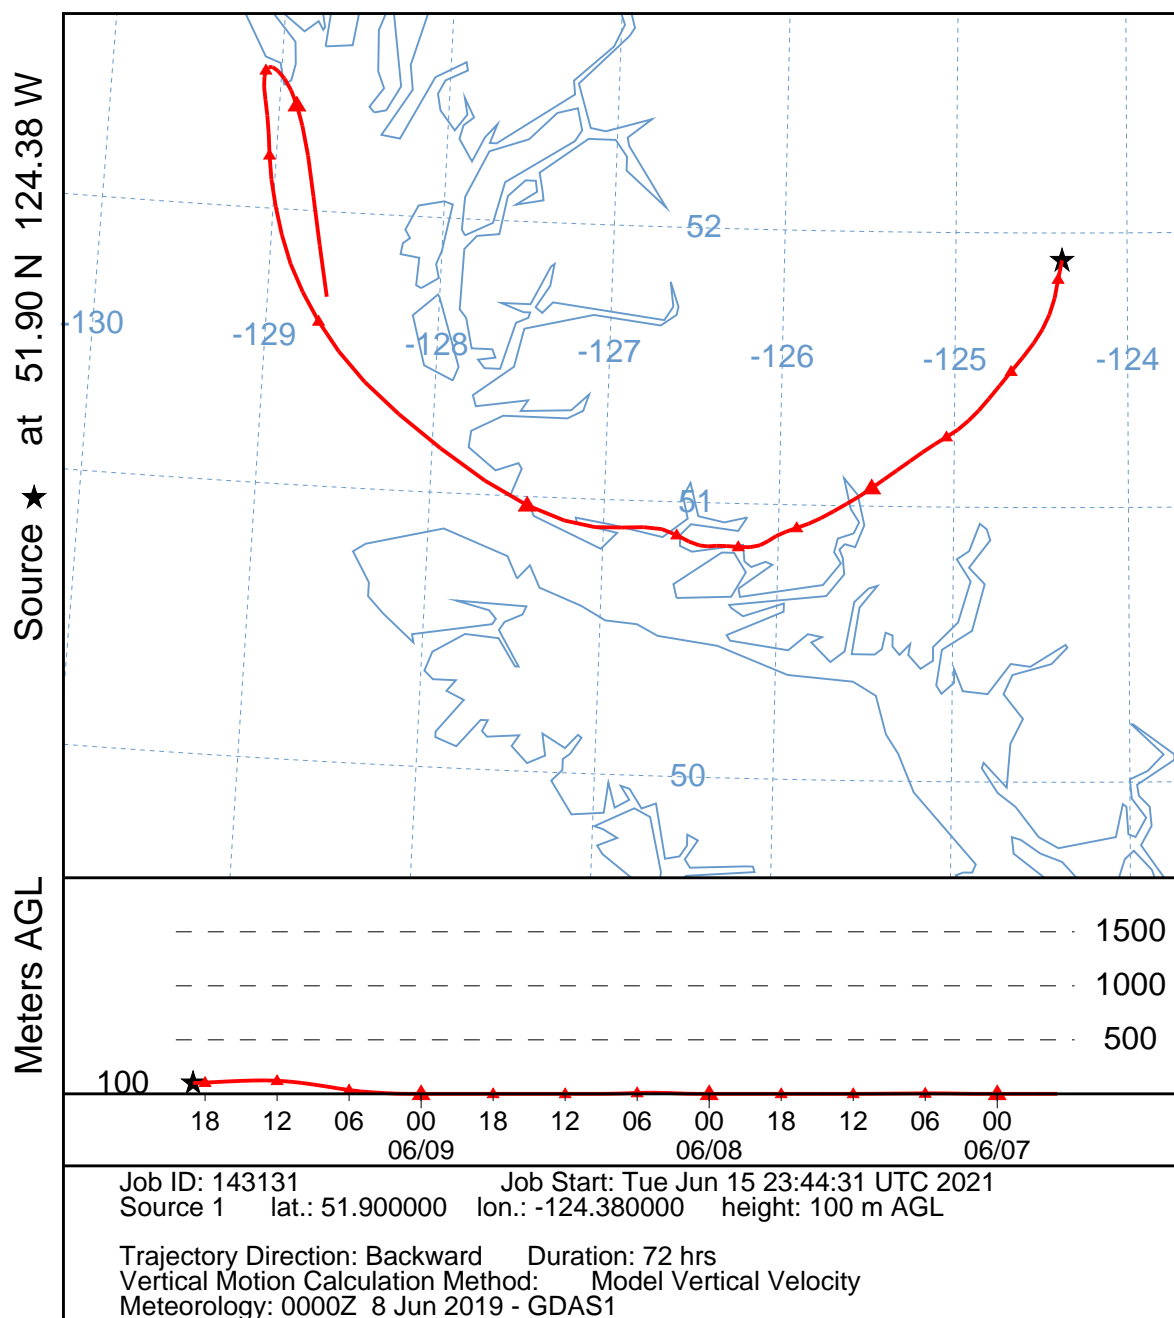

NOAA HYSPLIT MODEL  
Backward trajectory ending at 1900 UTC 10 Jun 19  
GDAS Meteorological Data

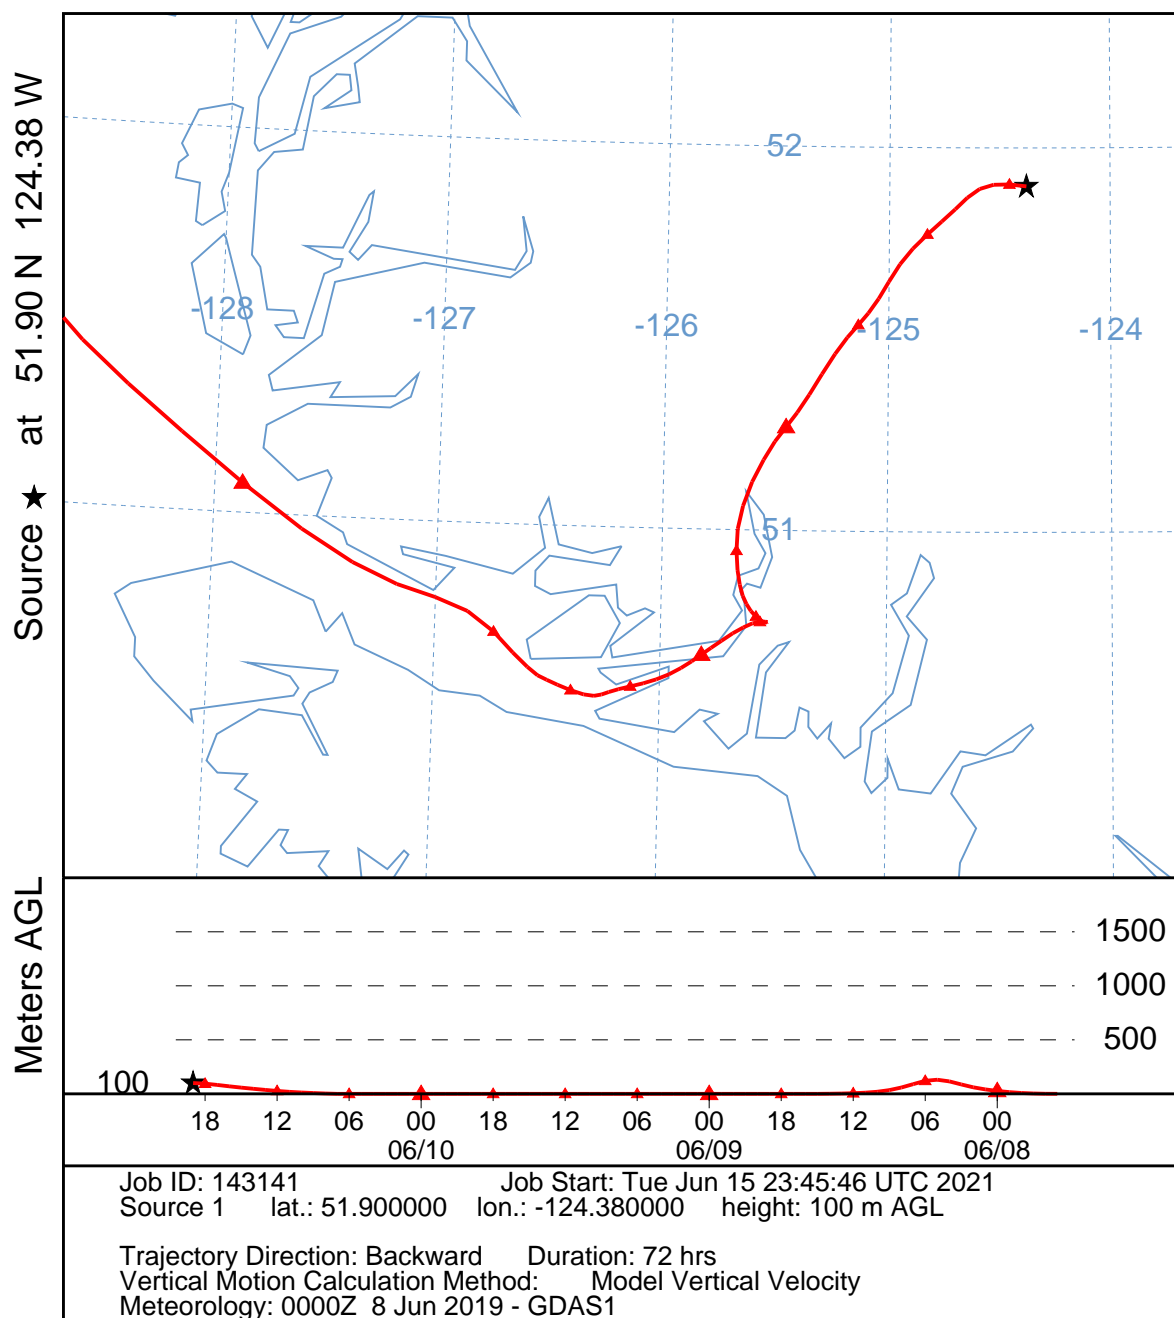

NOAA HYSPLIT MODEL  
Backward trajectory ending at 1900 UTC 11 Jun 19  
GDAS Meteorological Data

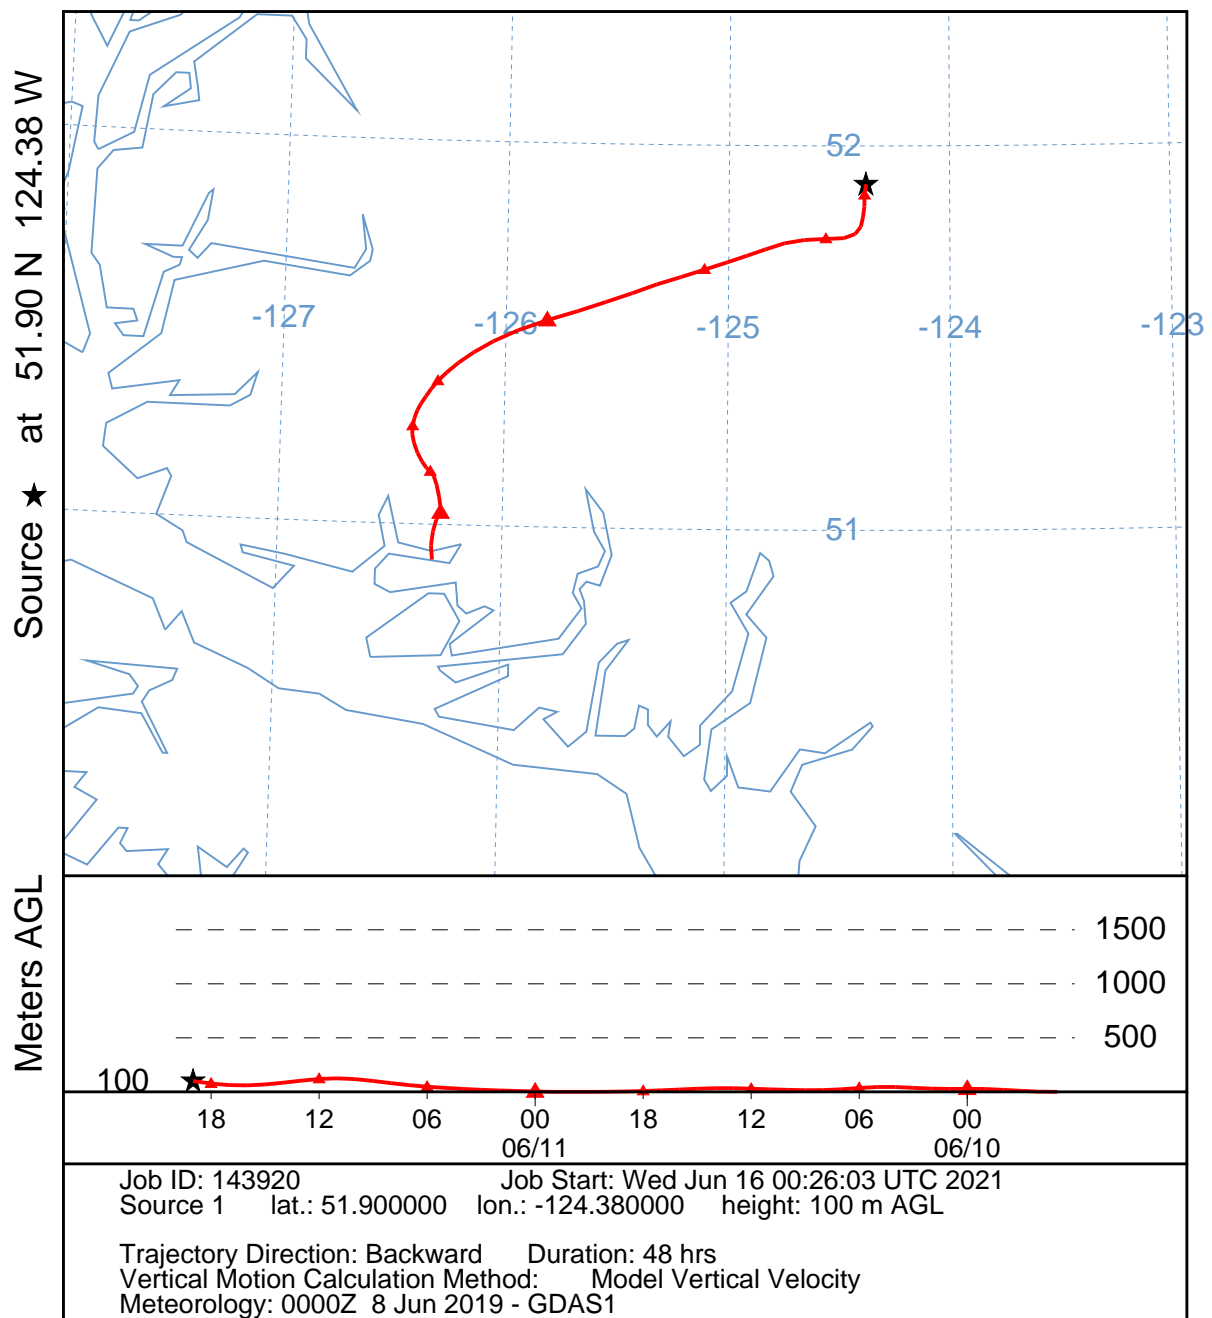



NOAA HYSPLIT MODEL  
 Backward trajectory ending at 1900 UTC 12 Jun 19  
 GDAS Meteorological Data

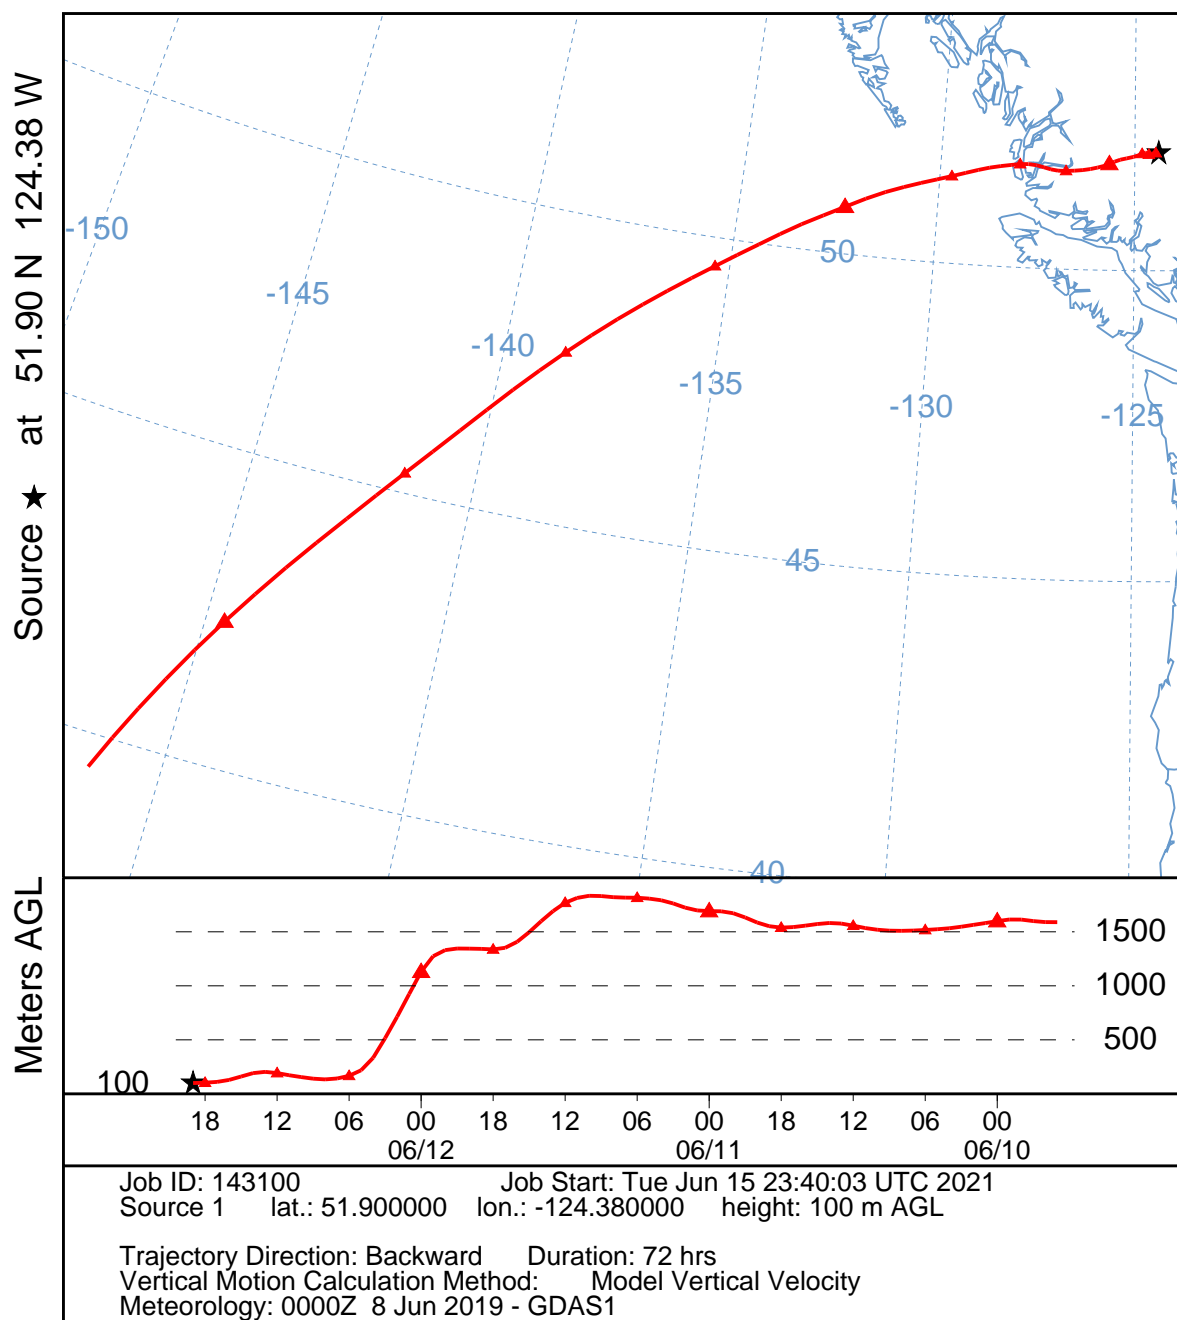

NOAA HYSPLIT MODEL  
Backward trajectory ending at 1900 UTC 13 Jun 19  
GDAS Meteorological Data

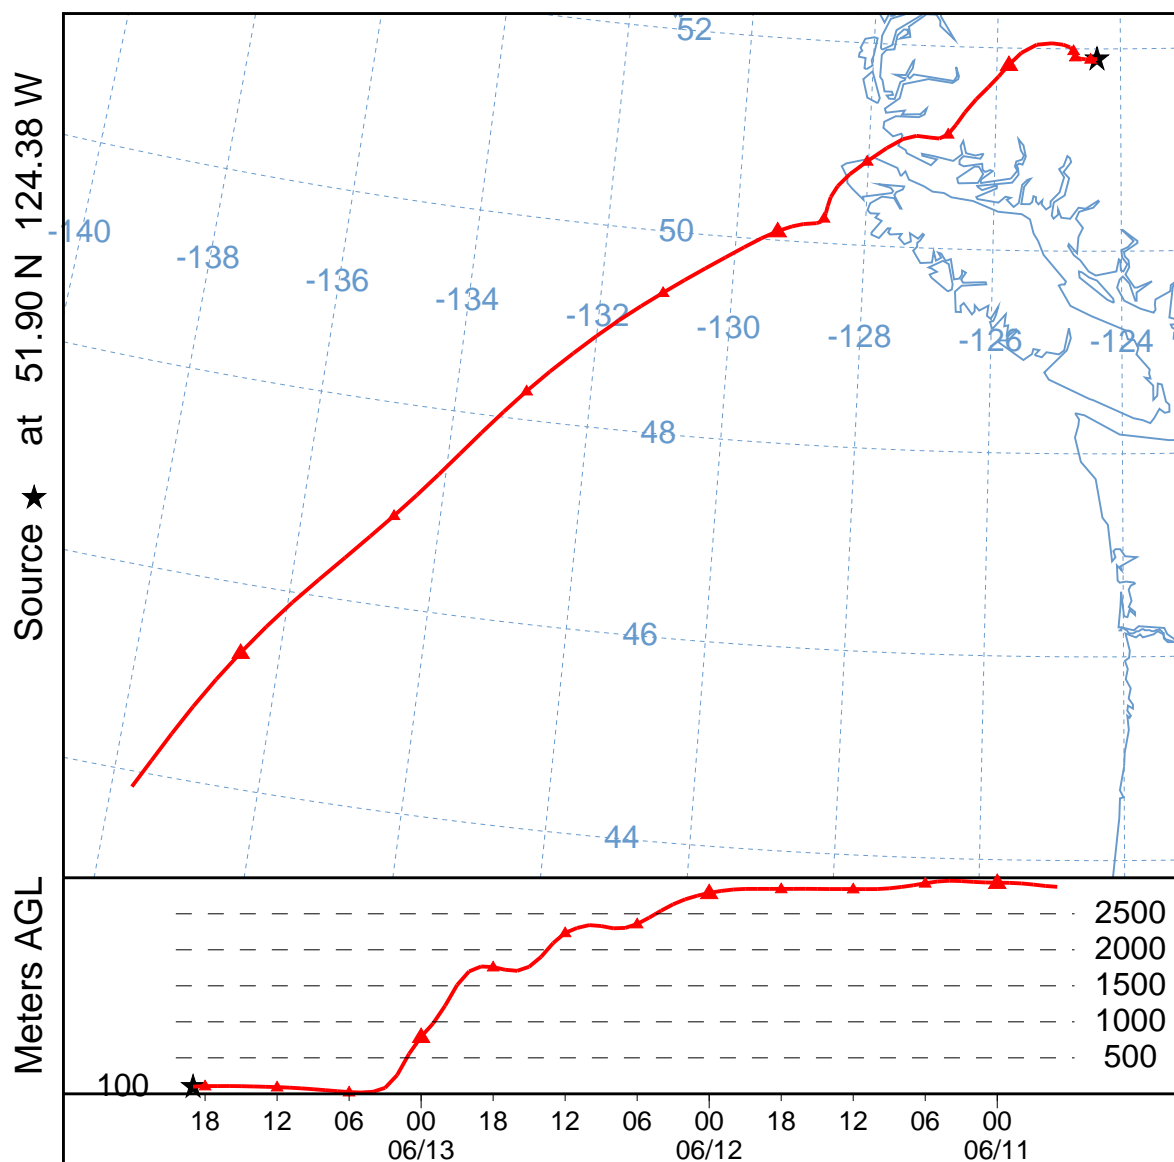

Job ID: 143099 Job Start: Tue Jun 15 23:38:42 UTC 2021  
Source 1 lat.: 51.900000 lon.: -124.380000 height: 100 m AGL

Trajectory Direction: Backward Duration: 72 hrs  
Vertical Motion Calculation Method: Model Vertical Velocity  
Meteorology: 0000Z 8 Jun 2019 - GDAS1

NOAA HYSPLIT MODEL  
Backward trajectory ending at 1900 UTC 14 Jun 19  
GDAS Meteorological Data

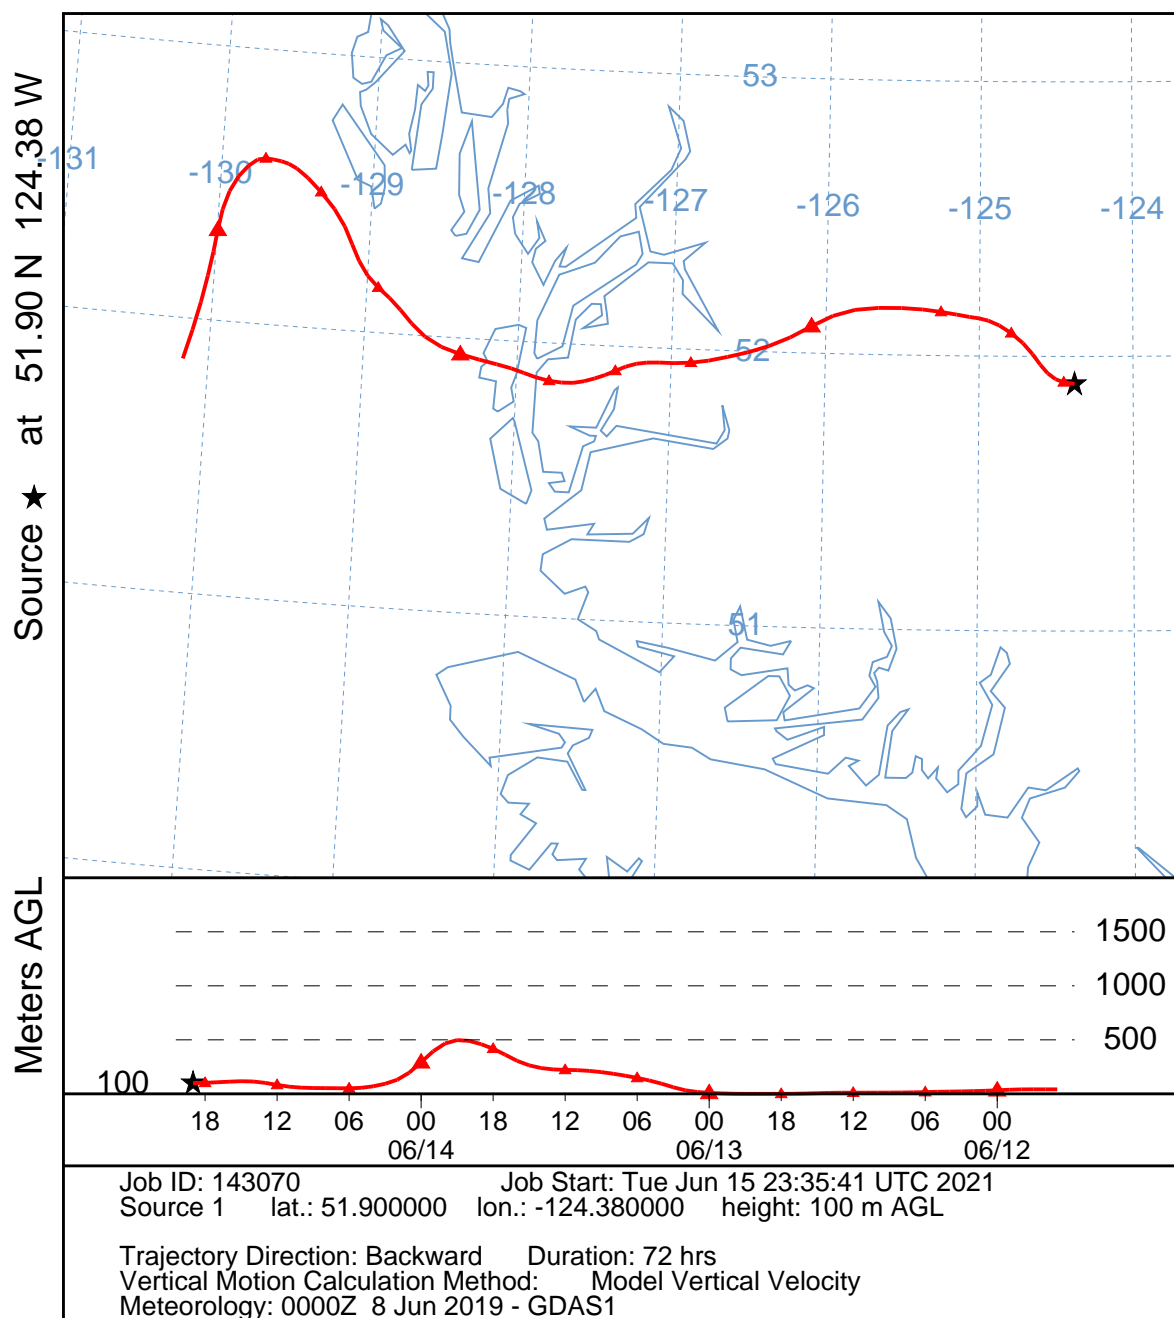

NOAA HYSPLIT MODEL  
Backward trajectory ending at 1900 UTC 15 Jun 19  
GDAS Meteorological Data

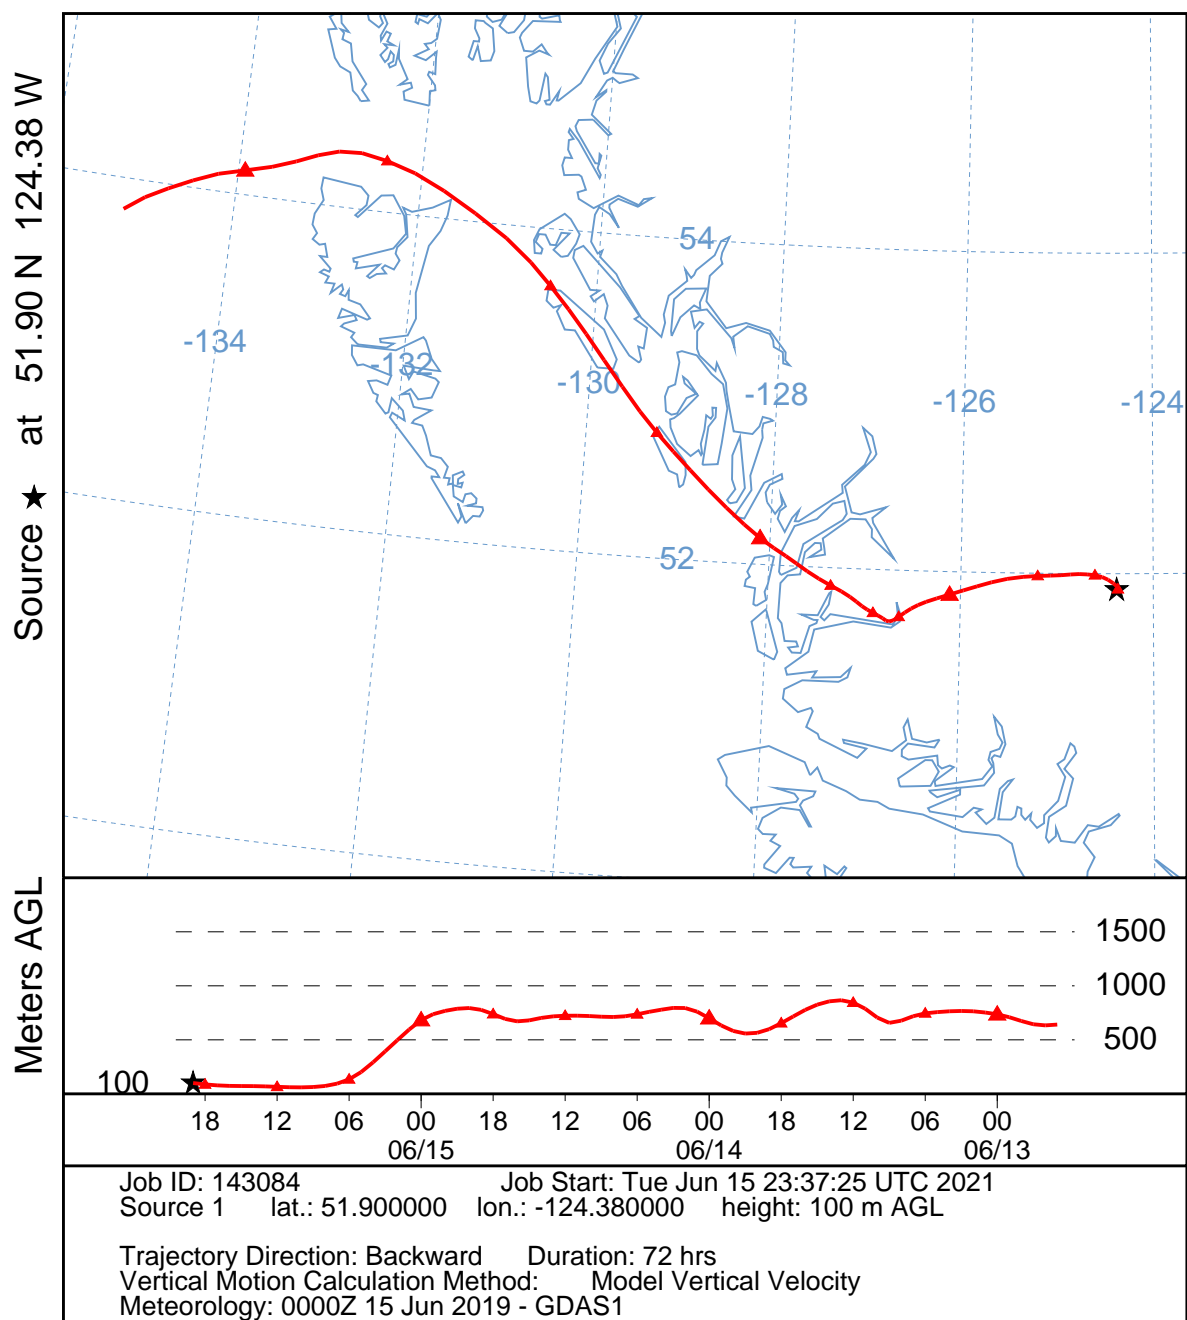

Supplement: Supplementary file 1 [file acp-2021-838-supplement.zip]
