# Supplementary material for: Frequent new particle formation at remote sites in the temperate/boreal forest of North America
Source: Copernicus journal article supplement (doi:10.5194/acp-2021-838), 2021-10-18

NOAA HYSPLIT MODEL  
Backward trajectory ending at 1900 UTC 16 Jun 19  
GDAS Meteorological Data

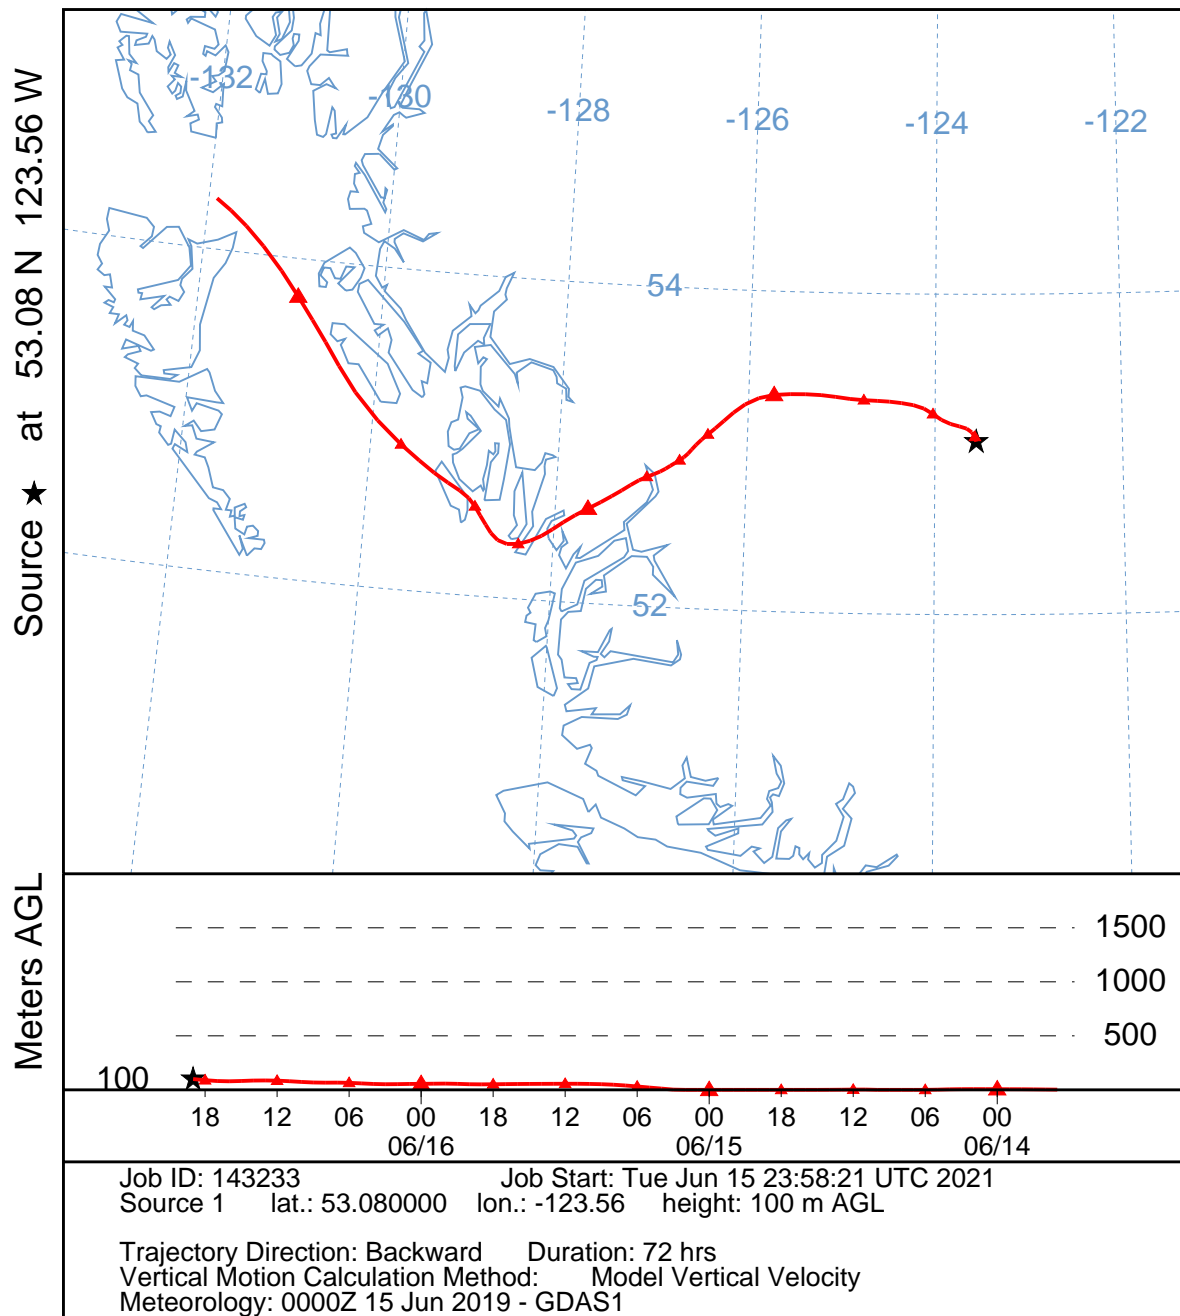

NOAA HYSPLIT MODEL  
Backward trajectory ending at 1900 UTC 17 Jun 19  
GDAS Meteorological Data

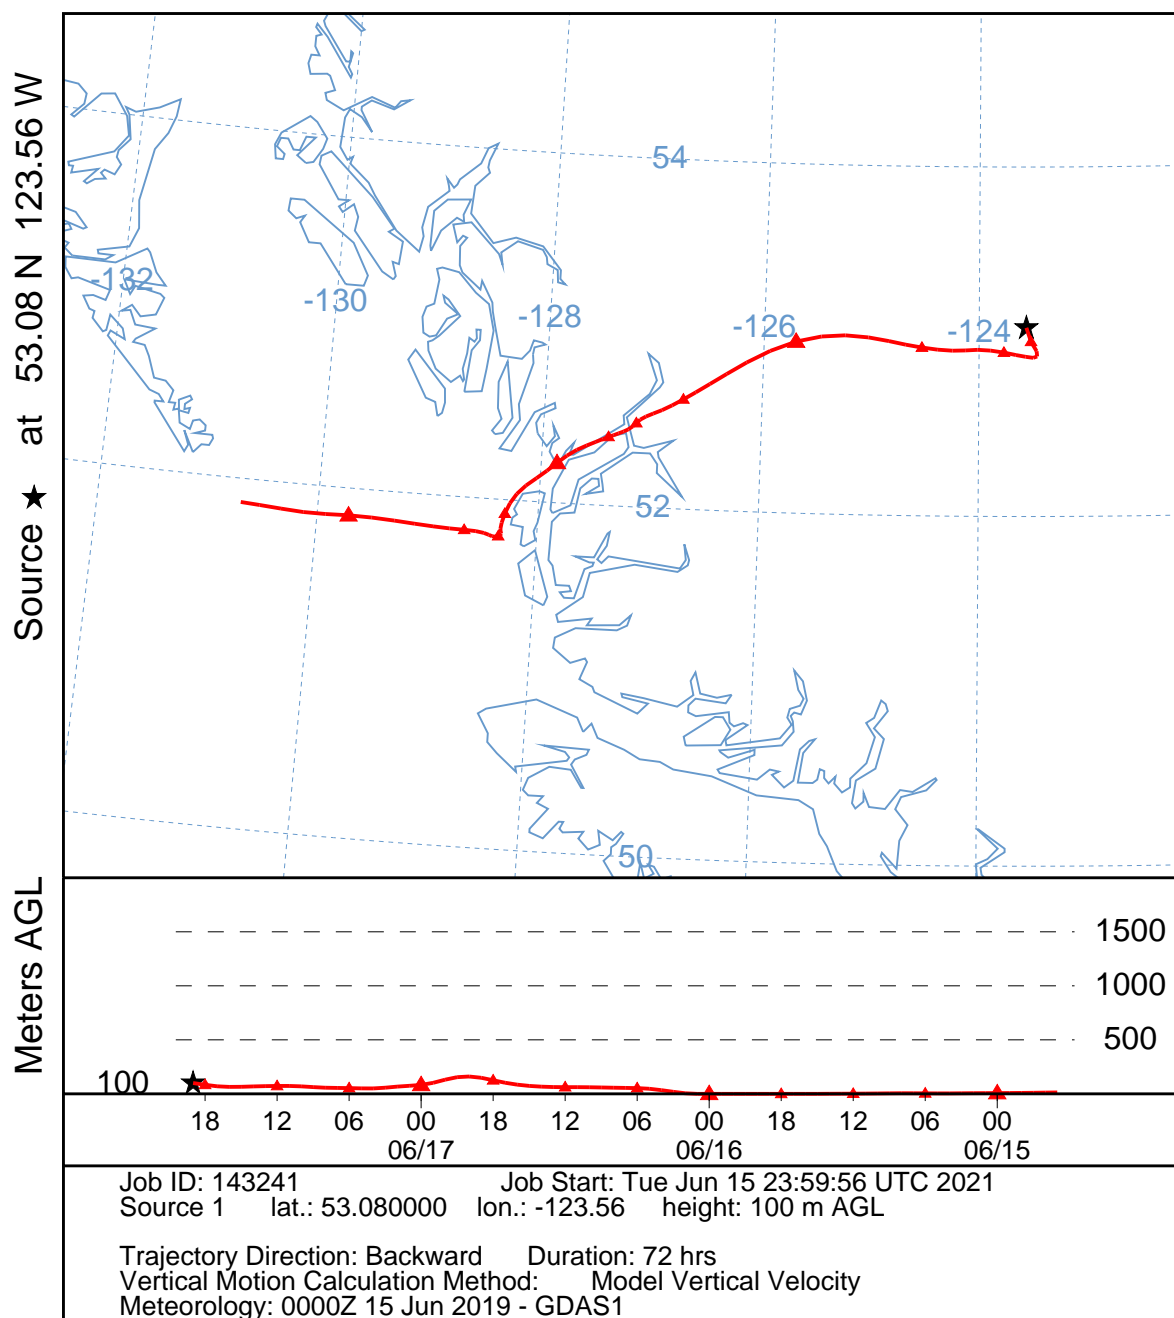

NOAA HYSPLIT MODEL  
Backward trajectory ending at 1900 UTC 18 Jun 19  
GDAS Meteorological Data

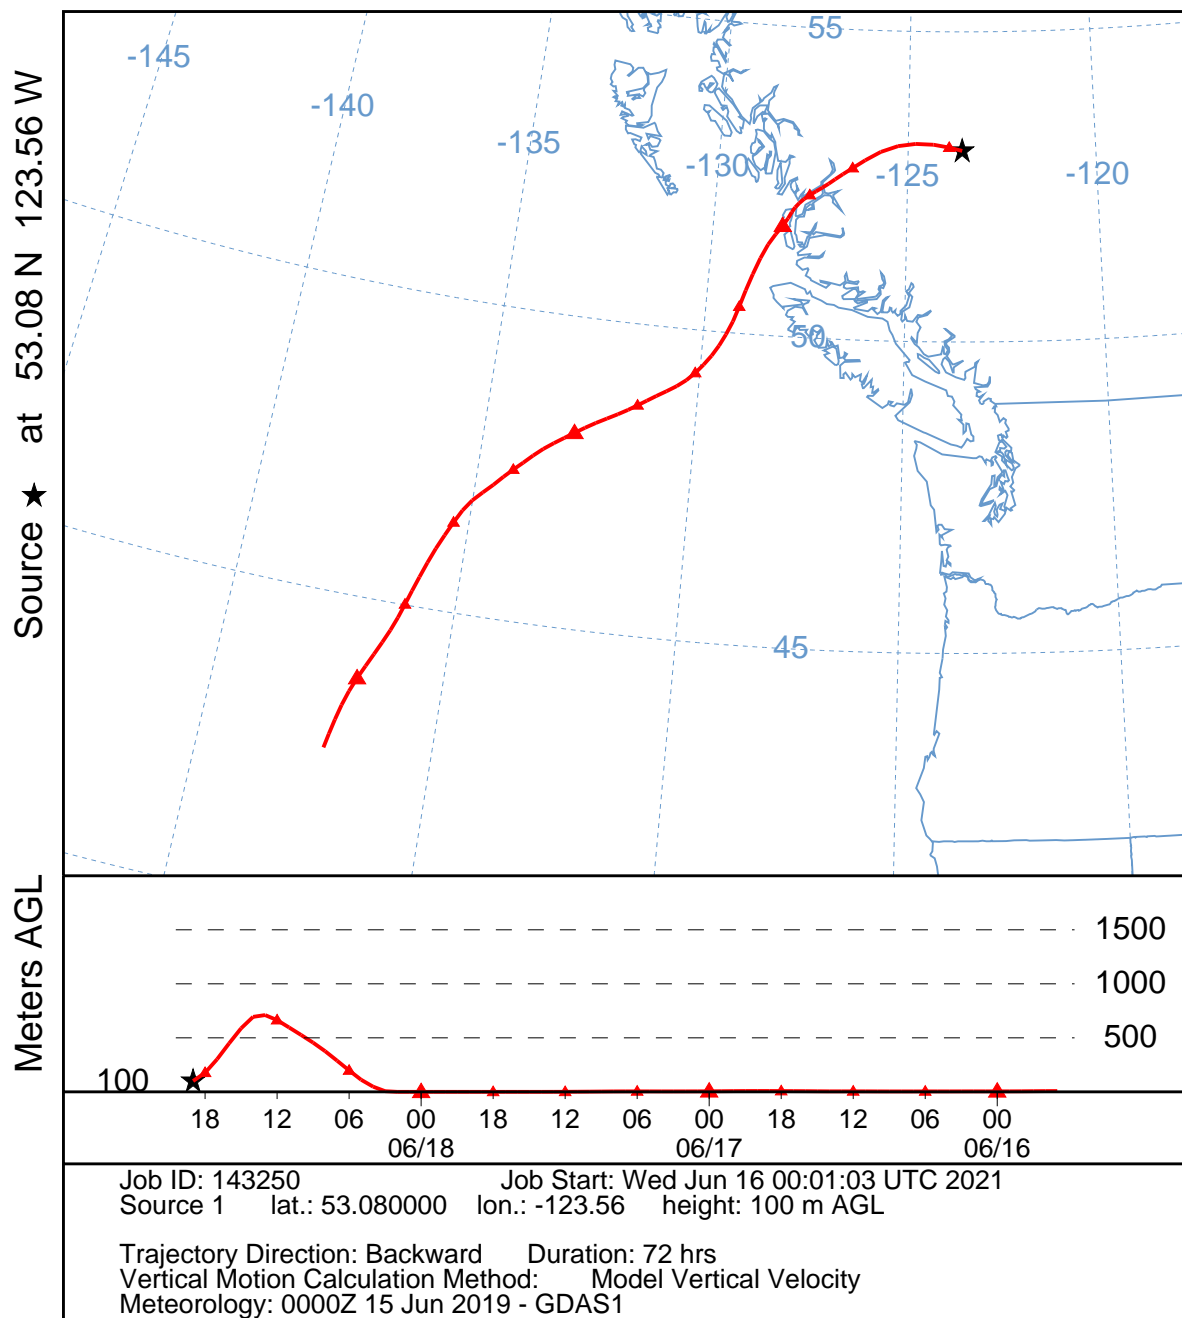

NOAA HYSPLIT MODEL  
Backward trajectory ending at 1900 UTC 19 Jun 19  
GDAS Meteorological Data

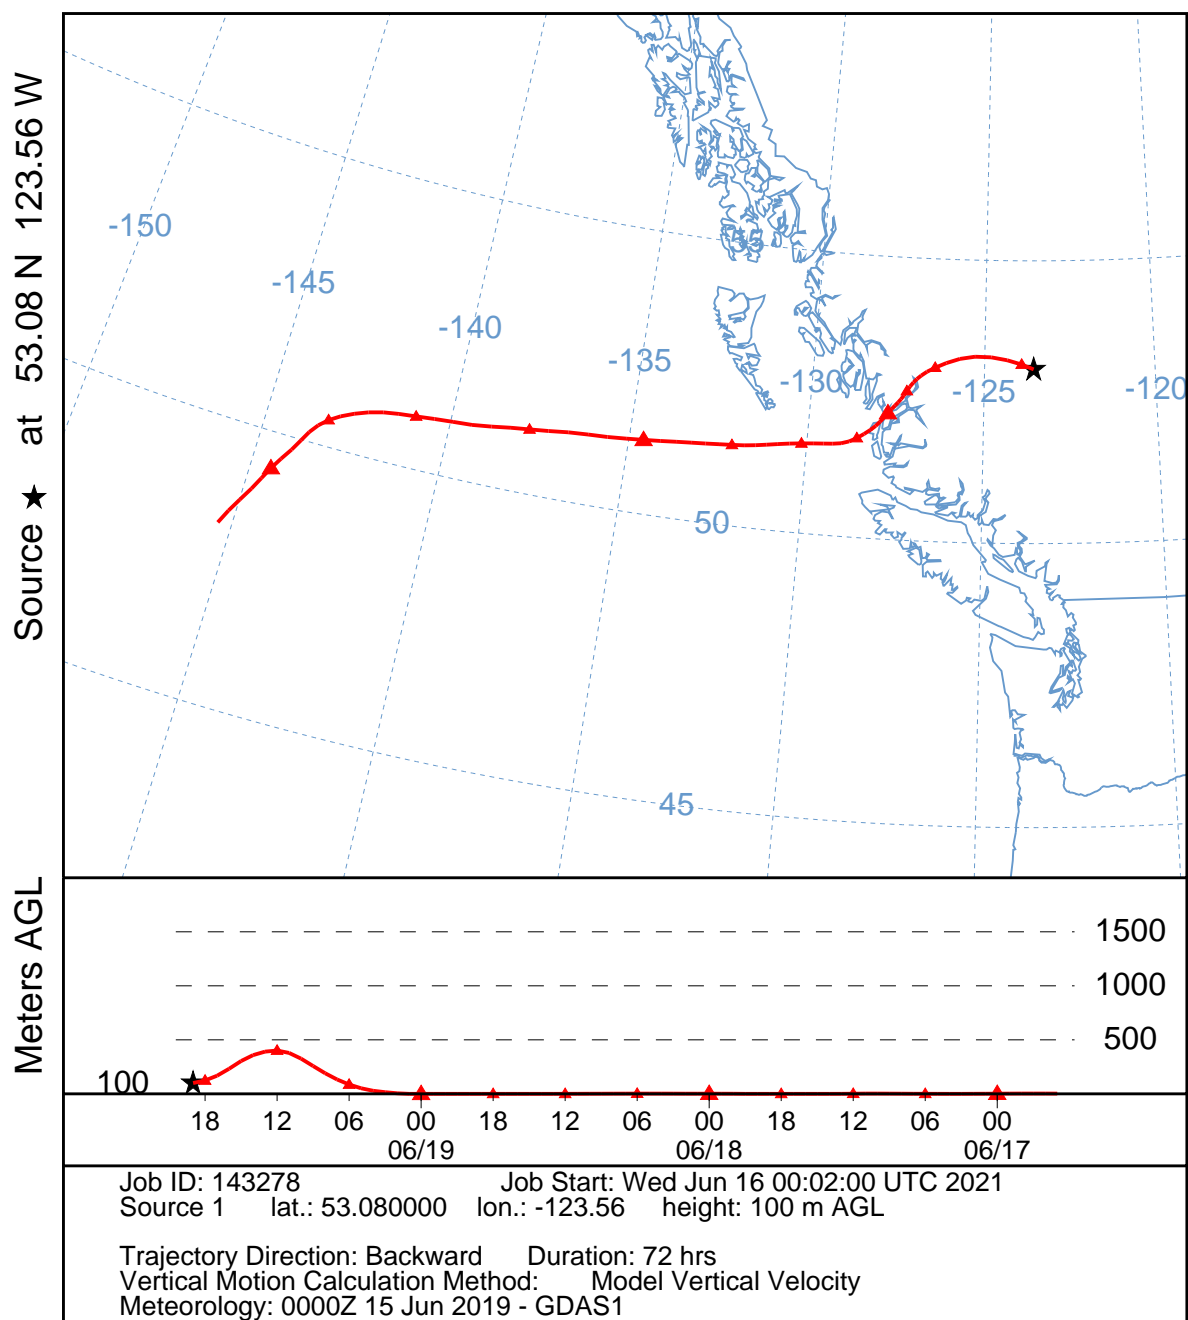

NOAA HYSPLIT MODEL  
Backward trajectory ending at 1900 UTC 20 Jun 19  
GDAS Meteorological Data

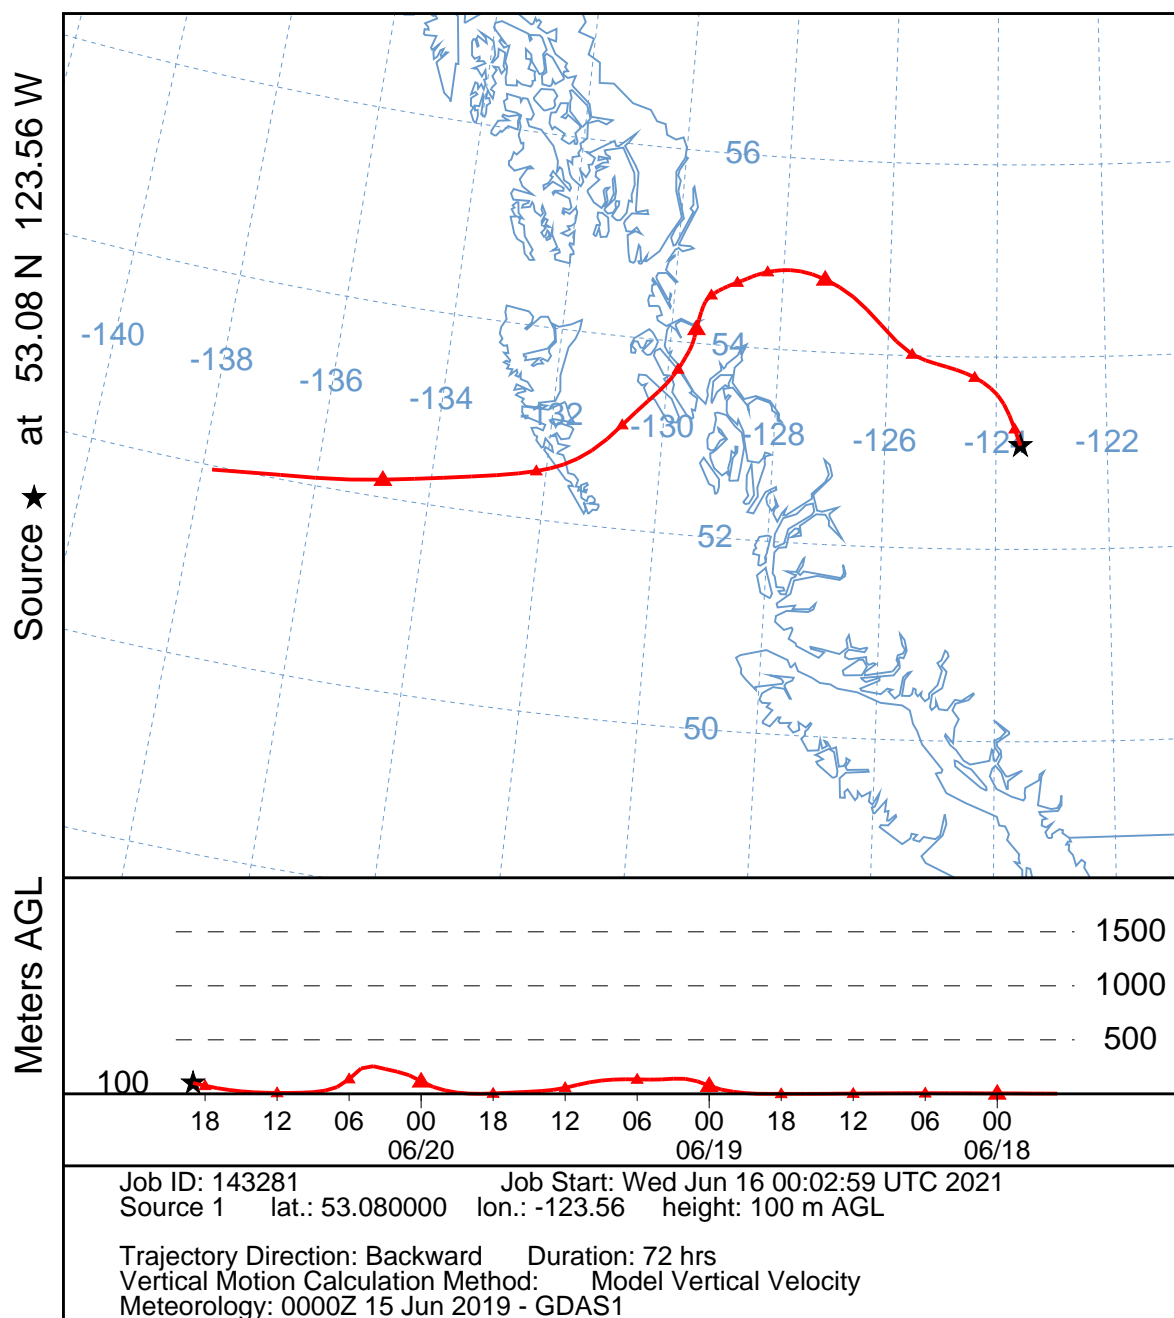

NOAA HYSPLIT MODEL  
Backward trajectory ending at 1900 UTC 21 Jun 19  
GDAS Meteorological Data

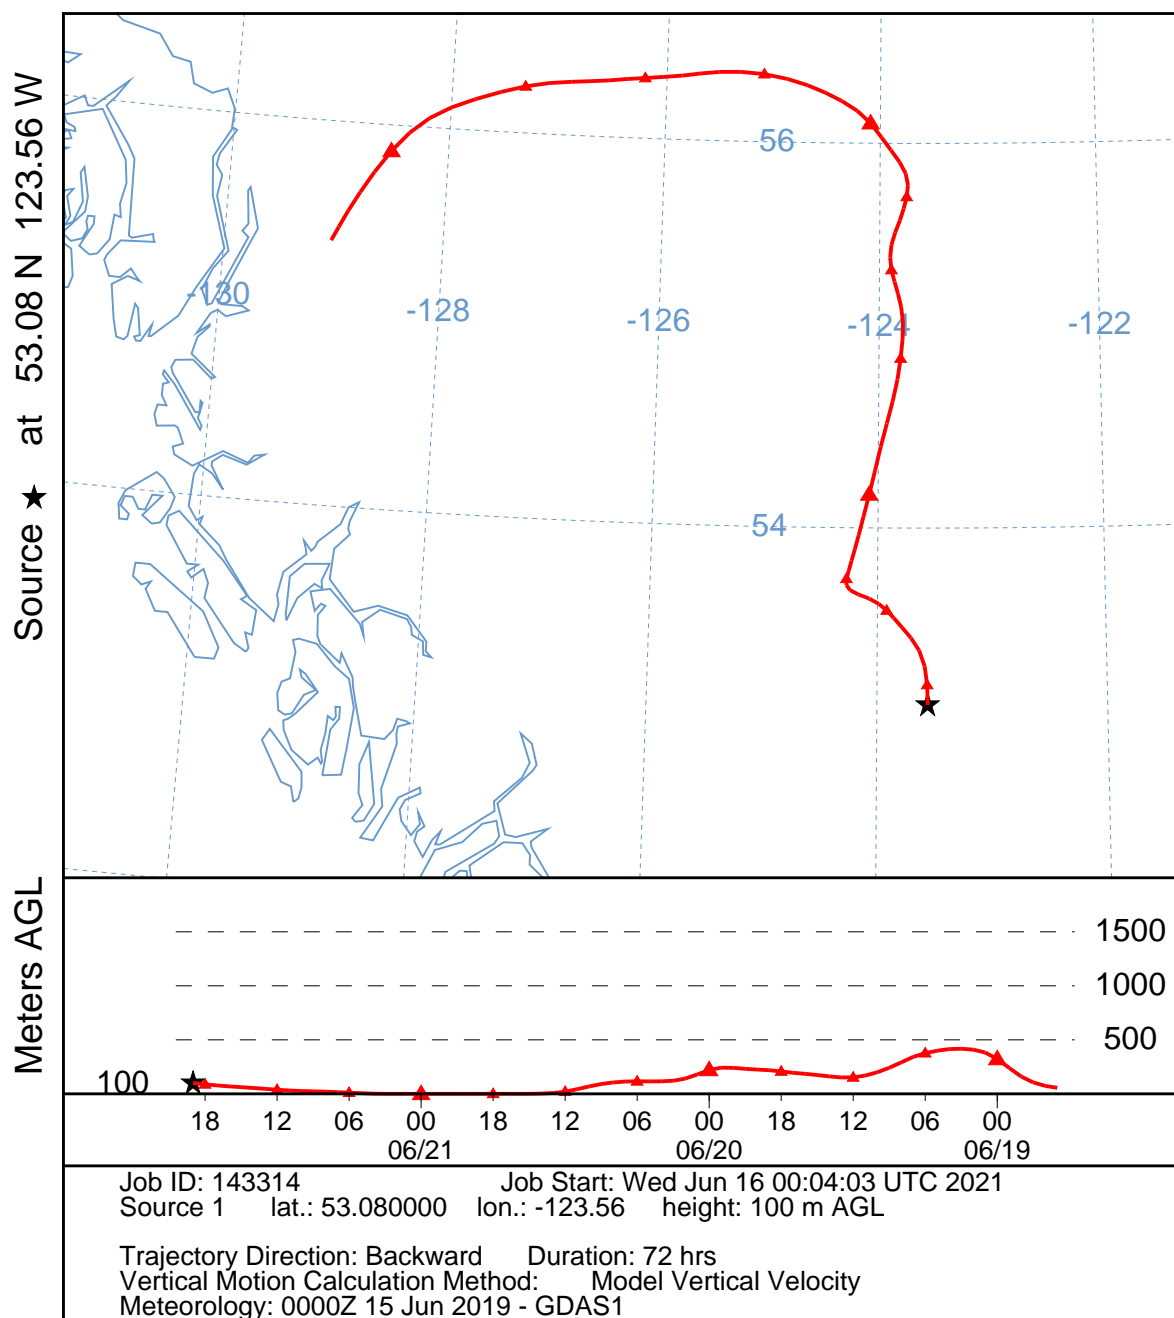

NOAA HYSPLIT MODEL  
Backward trajectory ending at 1900 UTC 22 Jun 19  
GDAS Meteorological Data

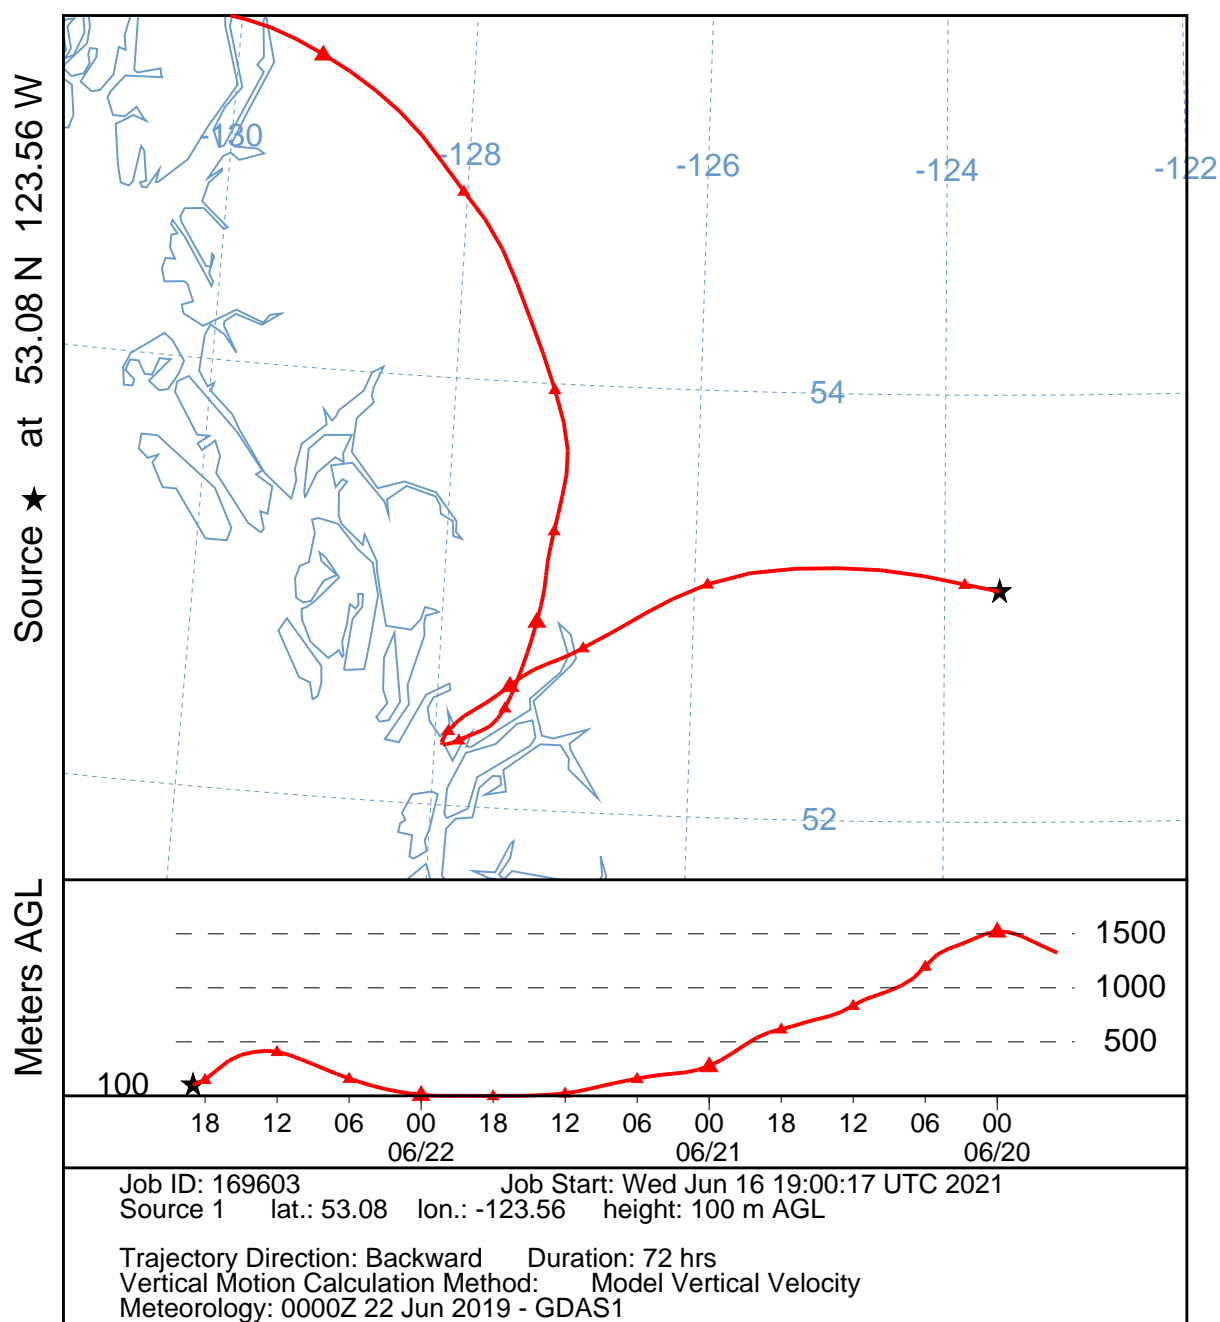

NOAA HYSPLIT MODEL  
Backward trajectory ending at 1900 UTC 23 Jun 19  
GDAS Meteorological Data

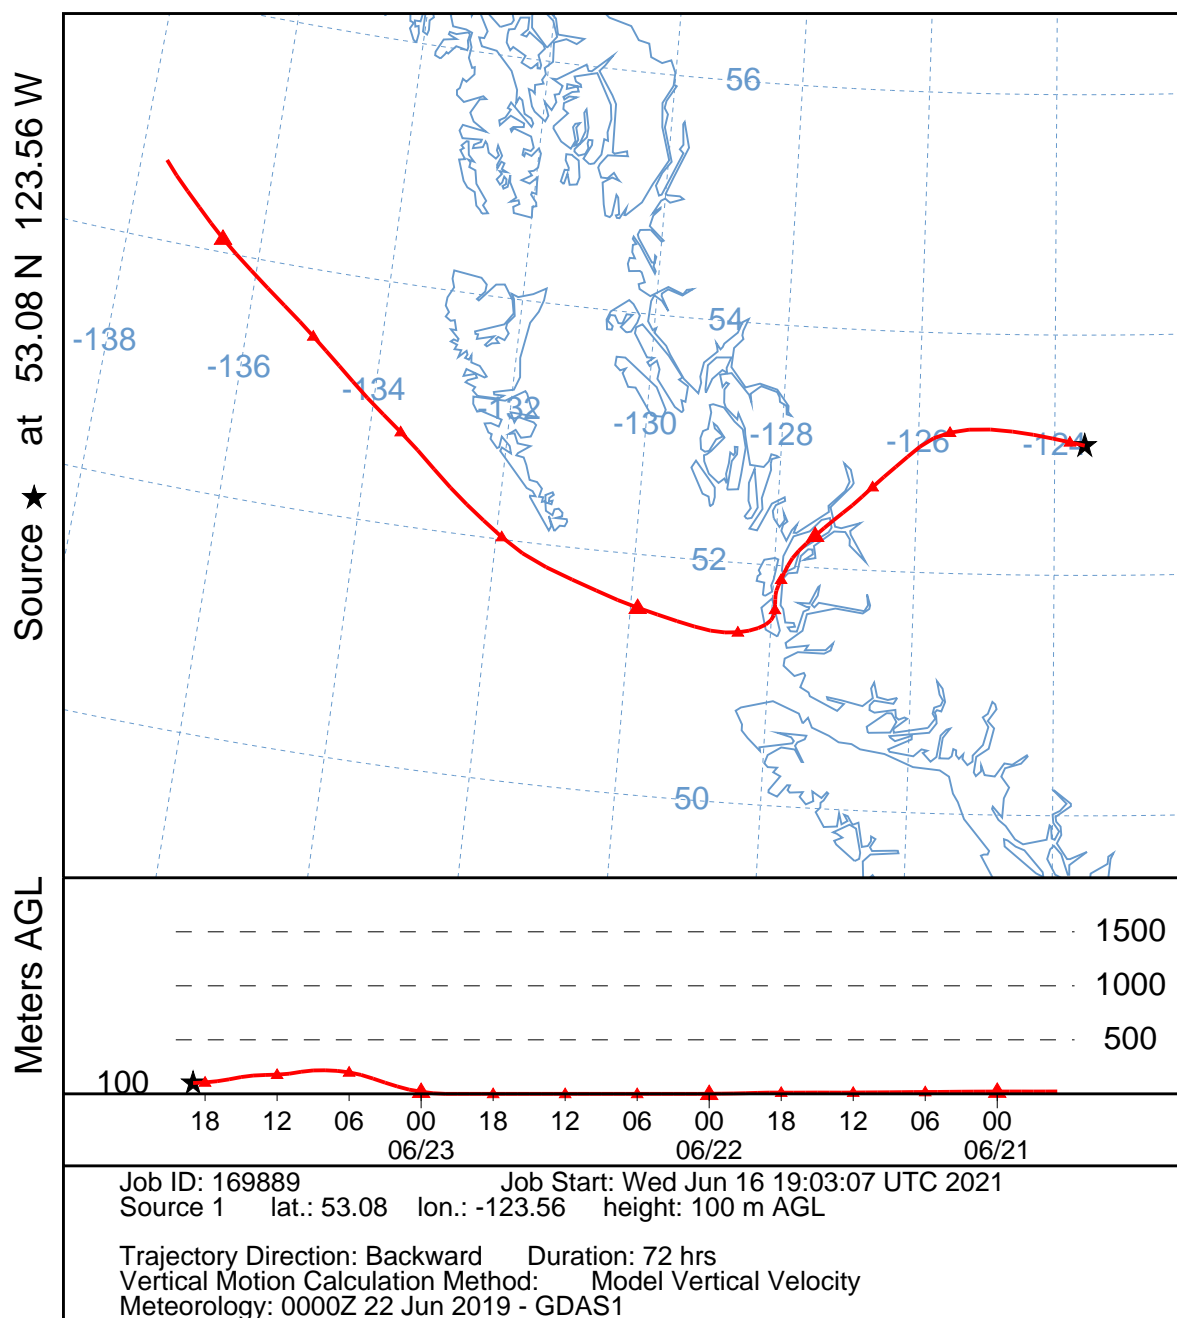

NOAA HYSPLIT MODEL  
Backward trajectory ending at 1900 UTC 24 Jun 19  
GDAS Meteorological Data

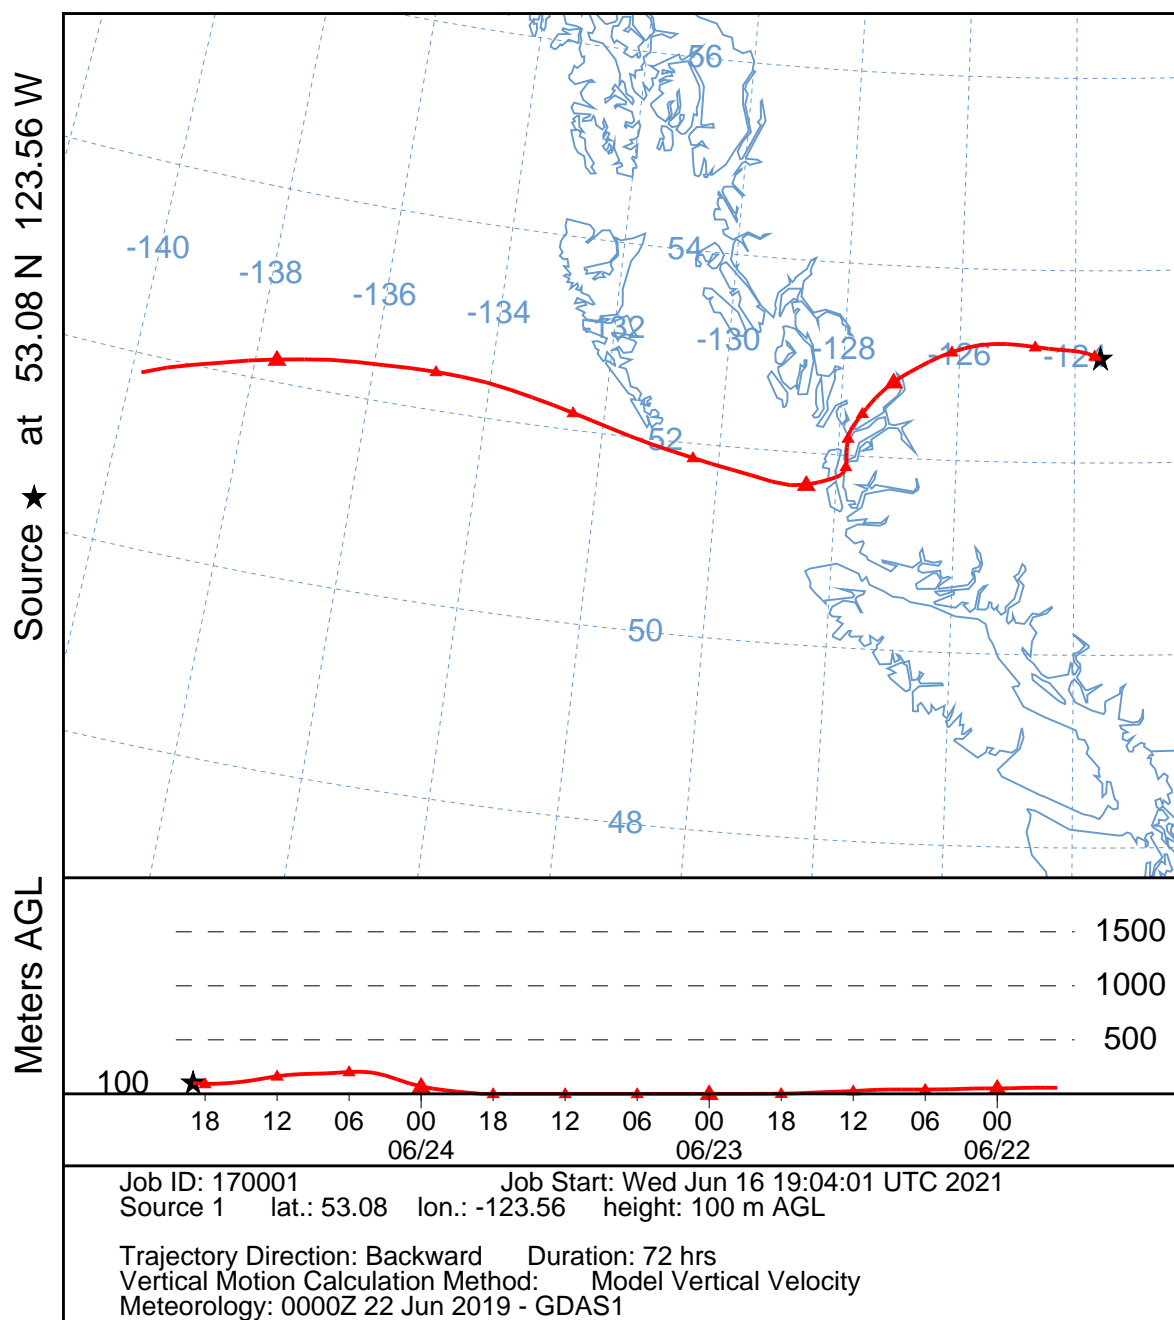

NOAA HYSPLIT MODEL  
Backward trajectory ending at 1900 UTC 25 Jun 19  
GDAS Meteorological Data

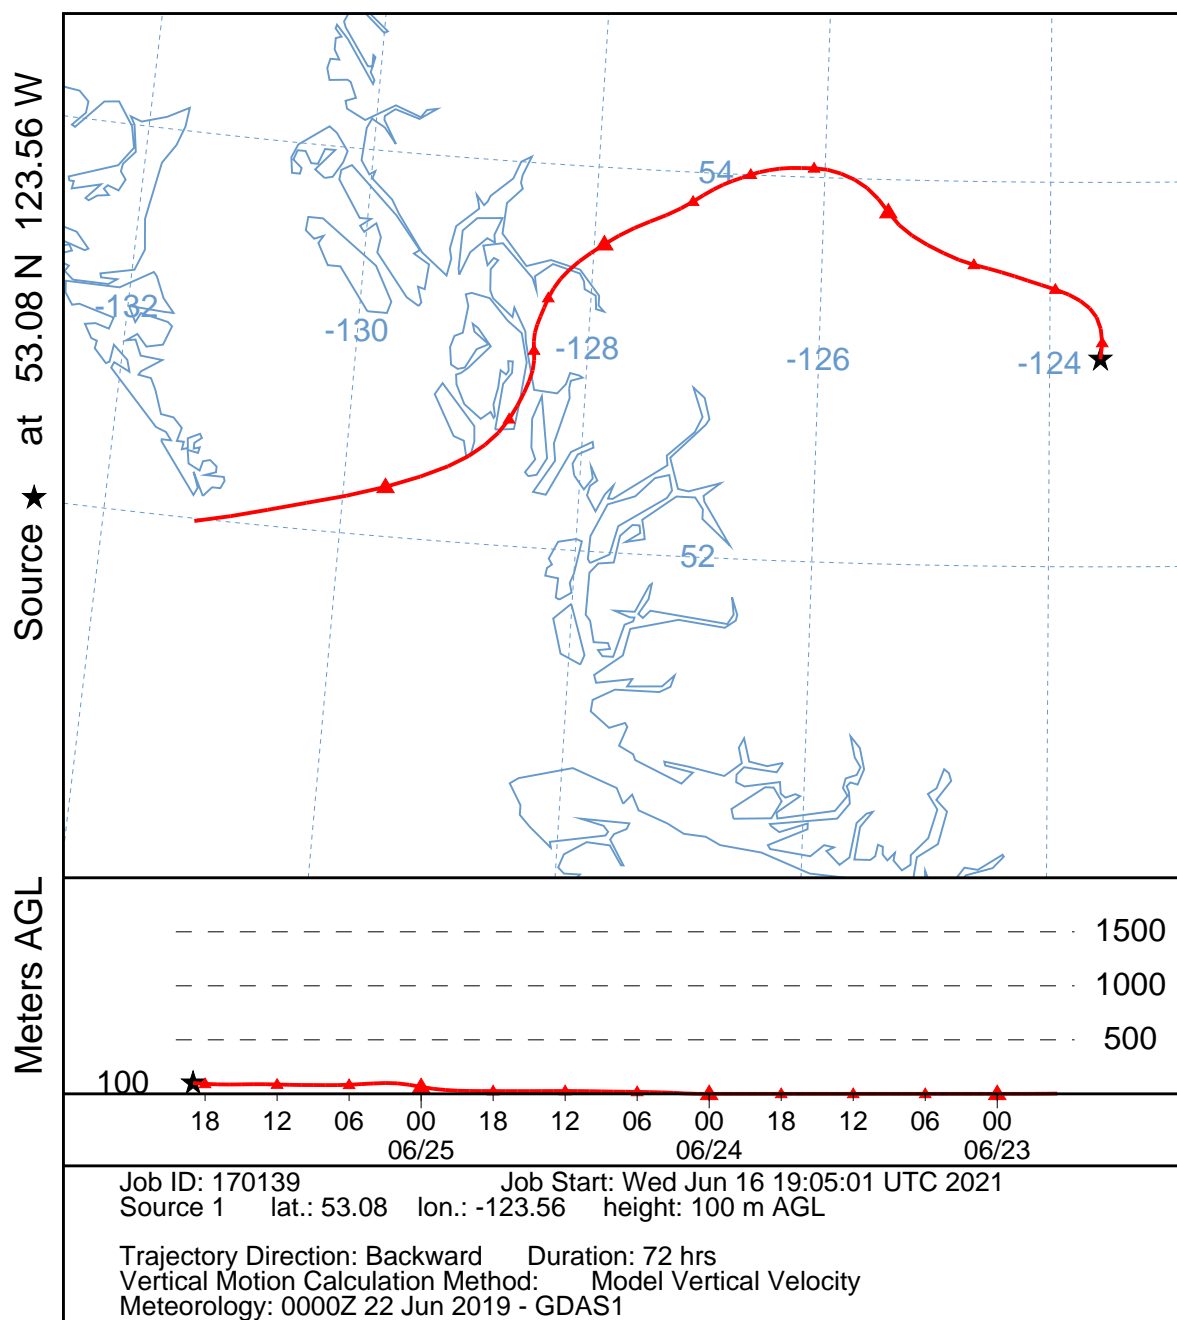

NOAA HYSPLIT MODEL  
Backward trajectory ending at 1900 UTC 26 Jun 19  
GDAS Meteorological Data

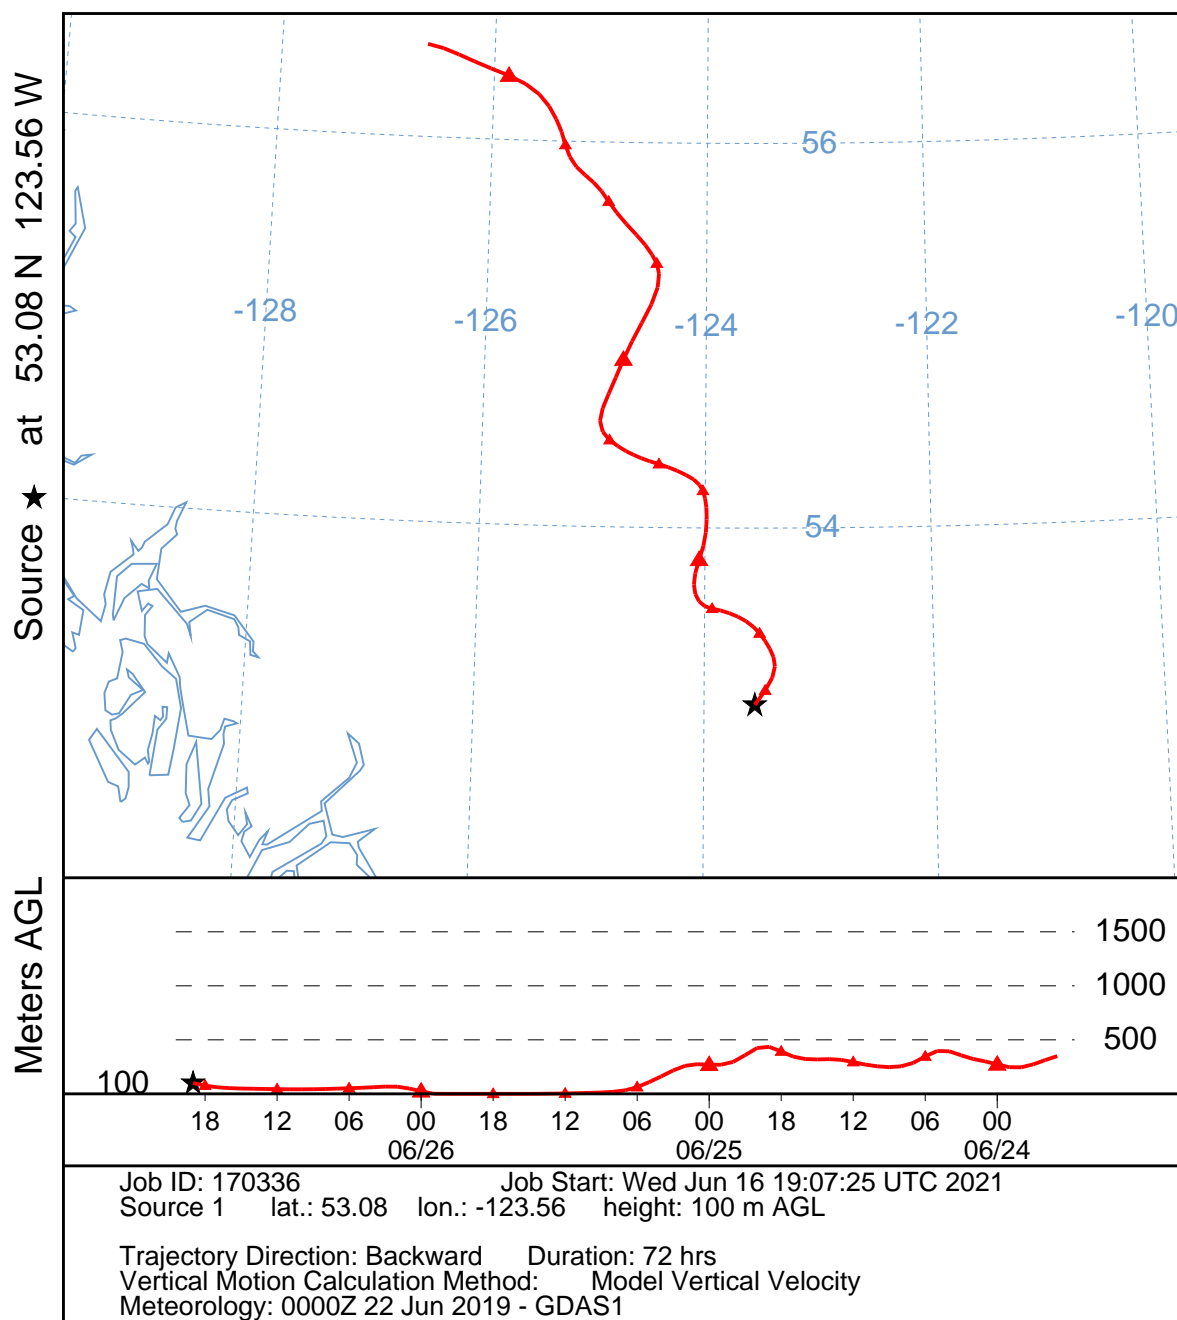

Supplement: Supplementary file 3 [file acp-2021-838-supplement.zip]
