# Supplementary material for: Frequent new particle formation at remote sites in the temperate/boreal forest of North America
Source: Copernicus journal article supplement (doi:10.5194/acp-2021-838), 2021-10-18
Supplement: Supplementary file 2 [file acp-2021-838-supplement.zip]

☆ Eagle Lake Site, 100 m, 10-day backtrajectories

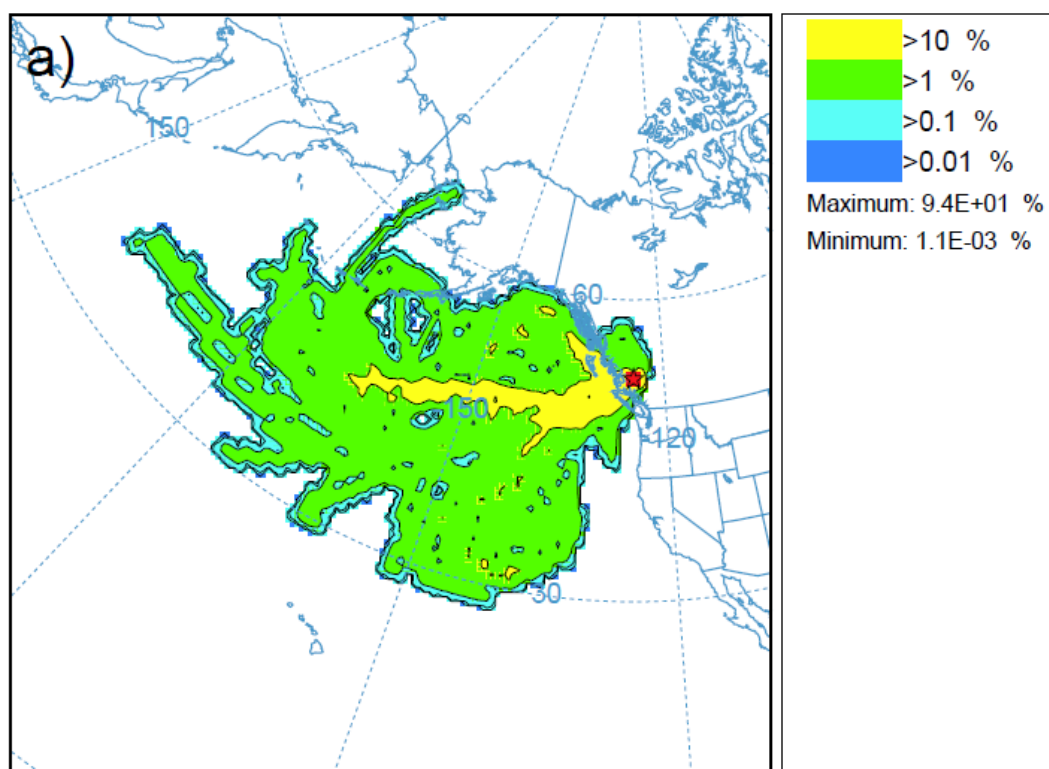

☆ Nazko River Site, 100 m, 10-day backtrajectories

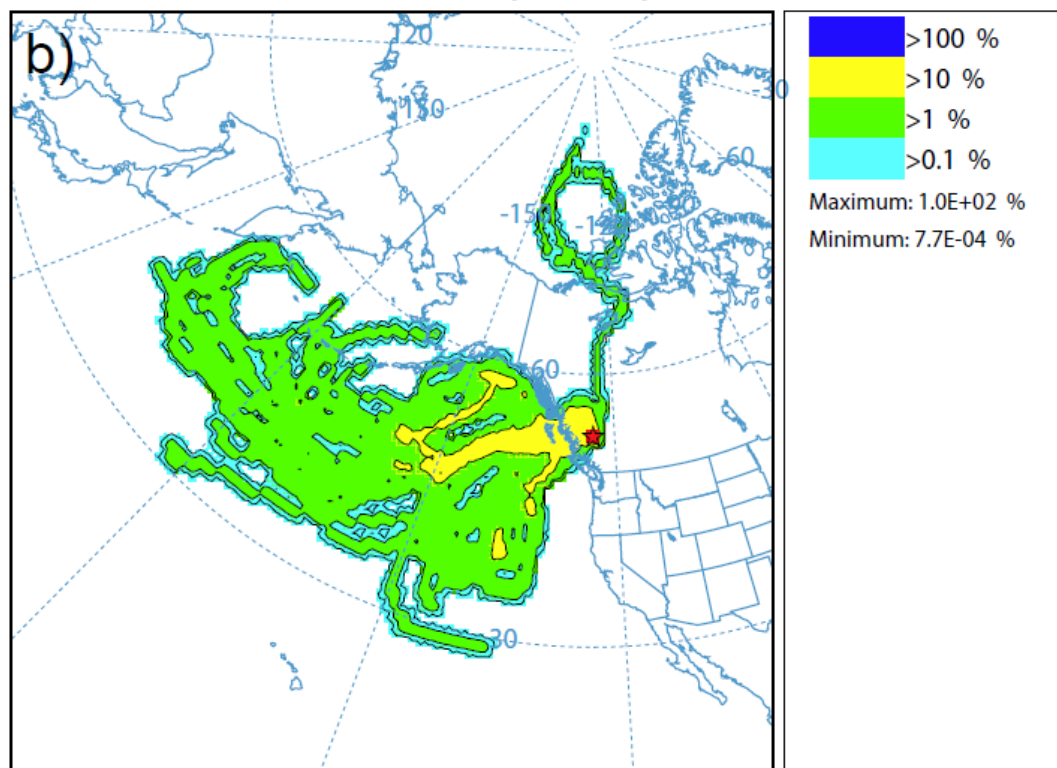

Fig. S1: Trajectory frequency statistics for 10-day backtrajectories initialized at 1900 UTC at 100 m above ground level on each of the sampling days at a) Eagle Lake and b) Nazko River.

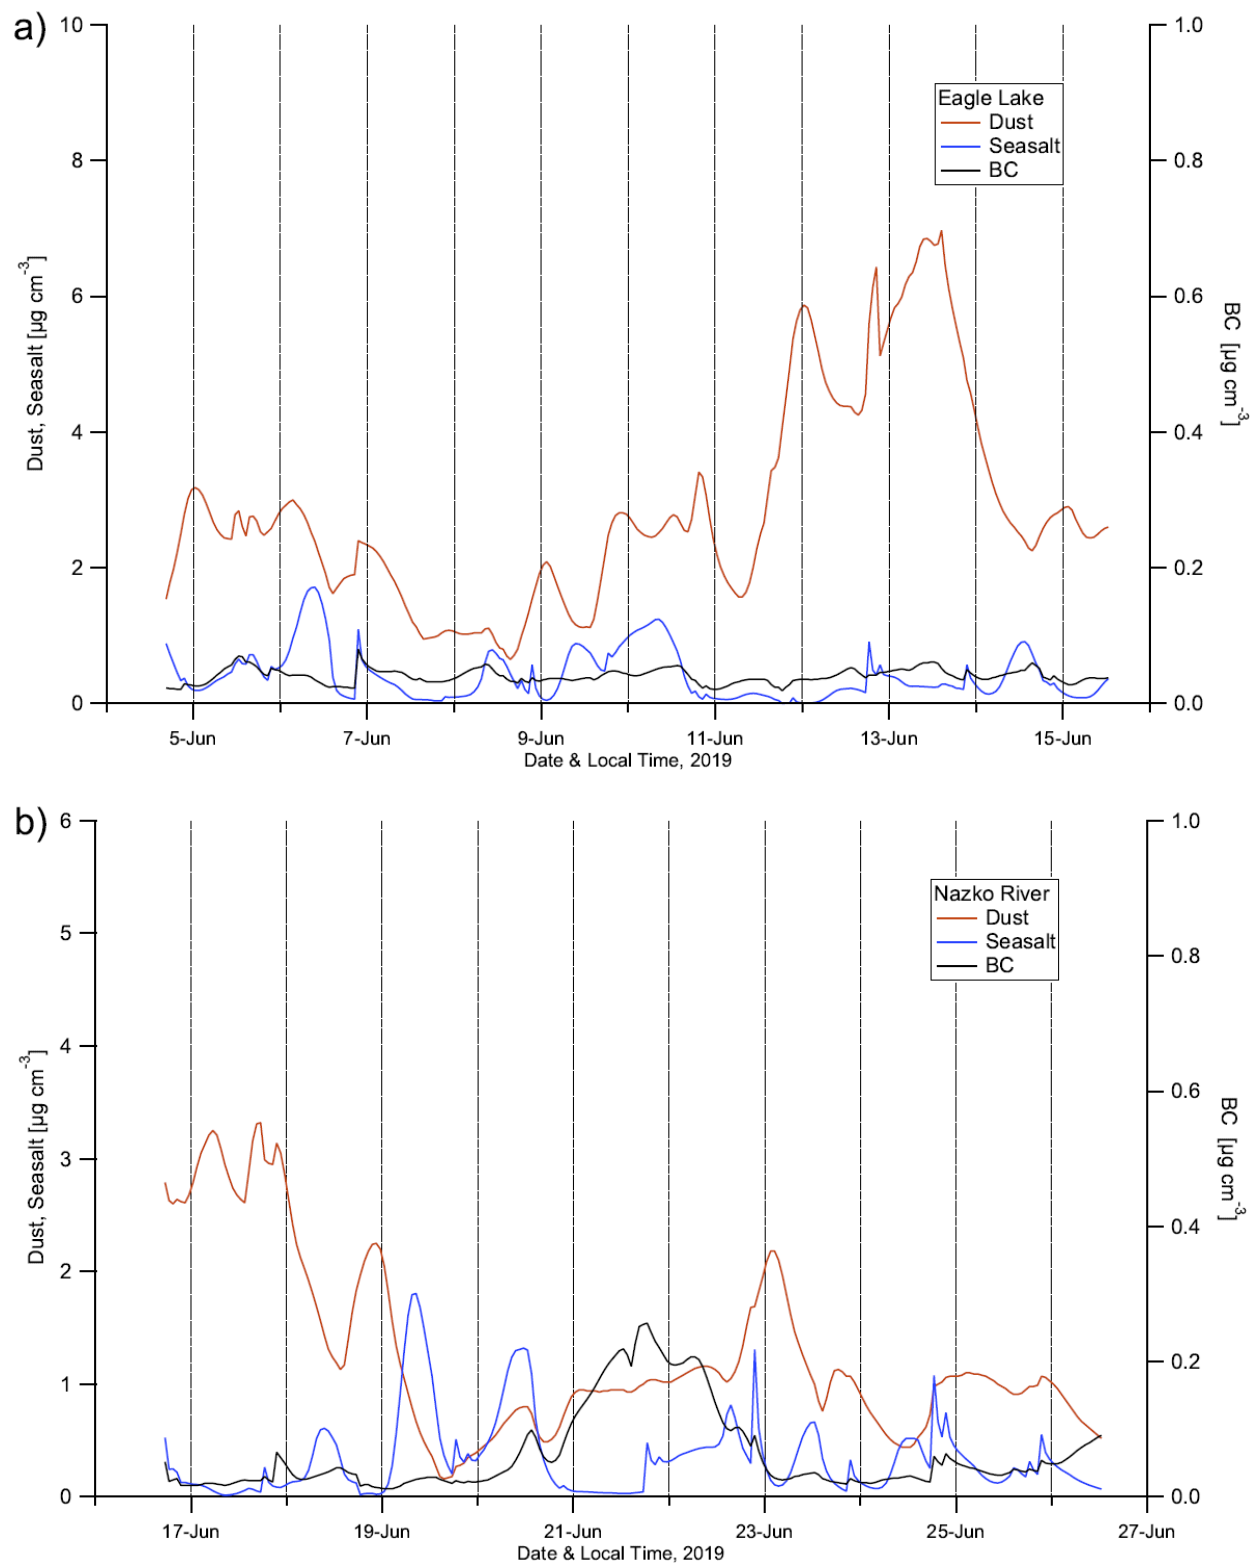

**Fig. S2: Concentrations of dust, seasalt, and black carbon (BC) aerosols in the study area from the MERRA-2 data base during the sampling periods at a) Eagle Lake and b) Nazko River.**

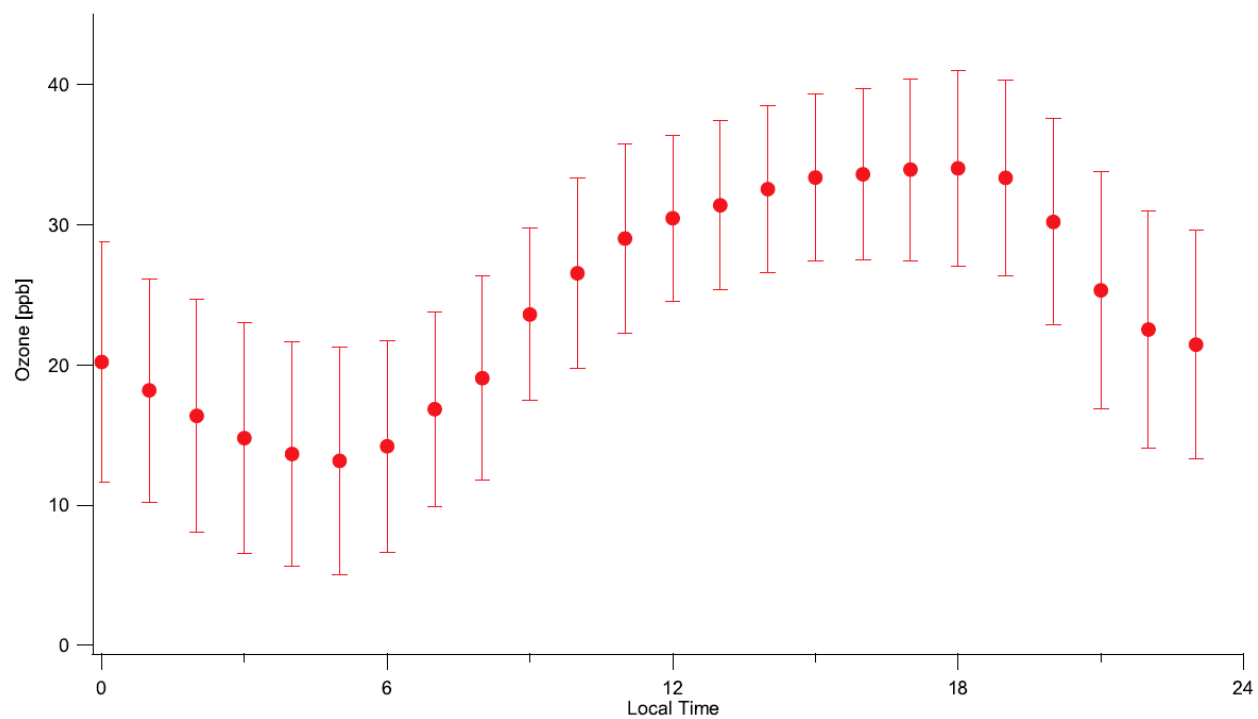

**Fig. S3: Ozone concentrations during June 2019 at Williams Lake, BC (averages and standard distributions).**
