# Supplementary material for: Frequent new particle formation at remote sites in the temperate/boreal forest of North America
Source: Copernicus journal article supplement (doi:10.5194/acp-2021-838), 2021-10-18
Supplement: Supplementary file 4 [file acp-2021-838-supplement.zip]

Archive with 3 entries (3 files):
- Supplement_EagleLake_Trajectories_daily.pdf
- Supplemental_Figs_S1-S3.pdf
- Supplement_NazkoRiver_Trajectories_daily.pdf
