# Supplementary material for: Frequent new particle formation at remote sites in the temperate/boreal forest of North America
Source: Copernicus journal article supplement (doi:10.5194/acp-2021-838), 2021-10-18
Supplement: Supplementary file [file acp-2021-838-AC1-supplement.pdf]

Reviewer comments are in italics, our responses in plain font.

*This manuscript investigates atmospheric new particle formation (NPF), a topic that has been of wide interest during the recent years. Although a large number of papers on NPF in forested environments has been published, and although many of these previous investigations are based on much larger measurement data sets as employed here, I think that this paper manages to bring up some new idea on the topic by focusing on differences between pristine and anthropogenic-influenced forested environments. The paper appears to be scientifically sound in terms of both applied methodology and performed analysis. Although somewhat speculative, the paper is in general very well written. I recommend accepting this paper for publication after the authors have addressed the following, mostly minor issues.*

We thank the reviewer for these positive comments. We would like to emphasize that while there are numerous studies on NPF in the Eurasian region, there are very few in North America, and none before ours had been performed in an environment approximating pristine conditions.

*Scientifically, the weakest feature of this paper is the shortage of data (less than one month of measurements), on which to base all the made conclusions. Previous long-term studies have pointed out a considerable variability in the characteristics of NPF from day to day, seasonally, and even between different years at a single measurement site. Therefore, one needs to be very careful how much to conclude from this data set. I understand that the number of data cannot be increased at this stage, and that the purpose of this paper is to raise up new scientific issues rather than to make firm conclusions. I also appreciate that the authors have tried to take the shortage of data into consideration when discussing the results. However, I still think that the authors should bring up this issue more explicitly throughout the paper when discussing the results. This would benefit specifically those readers that not very familiar with this research topic.*

As the reviewer correctly states, the purpose of our study was not to be the final word on NPF in North America. Rather, we wanted to conduct a pilot study in what we believe to be one of the most pristine subboreal forest environments in the Northern Hemisphere, in order to stimulate further, more comprehensive and long-term studies on this issue. We had already alluded to the limitations of our data set in the original manuscript, e.g., l. 169-170 (old): “Given the relatively short duration of our study compared to the long-term studies at some other sites, we can only make limited comparisons regarding NPF frequency at our BC sites.”

In addition, we now state at the beginning of the conclusions: “We conducted a pilot study on NPF at two pristine sites in the temperate/boreal transition zone of British Columbia, Canada, extending over four weeks of measurements in June 2019. At both sites, we observed a high frequency of NPF events.”

In the last paragraph of the Conclusions, we again emphasize the limited duration of our campaign, and highlight the need for longer-term studies.

Based on a suggestion by Reviewer 2, we also made a comparison between the meteorological conditions during our campaign with the long-term averages and found no substantial bias. We

are now also including land cover maps (Figs. 1a and 1b) that show that our sites are surrounded by vegetation typically of the region.

*The end of section 1 lacks clear scientific objectives of this study. They should be added, especially when considering that the other parts of the introduction are very well written and informative.*

We added the following text at the end of section 1:

“The objectives of our study were (1) to determine whether NPF in a pristine subboreal forest environment was frequent, like at the Scandinavian sites, or almost non-existent, like at the Central Siberian sites, (2) elucidate the role of anthropogenic SO<sub>2</sub> emissions in NPF by making measurements in a region where such emissions were likely to be negligible, (3) examine the hypothesis that nighttime NPF would be frequent in the absence of significant sources of H<sub>2</sub>SO<sub>4</sub> vapor, and (4) examine whether the results from such a limited pilot study would warrant future, more comprehensive and extended studies.”

*Minor issues*

*The authors use 2-day air mass trajectories, yet make conclusions to 3 days of air mass transport back in time (line 205). Is this based on extrapolation of available air mass trajectories or what? Some justification here is needed.*

We based our analysis of air mass history on both 48-hour and 10-day backtrajectories. This was maybe not clearly enough stated in the text. We now added the following sentence at the beginning of section 3.2:

“We investigated the history of the sampled air masses using 48-hour and 10-day backtrajectories initialized 100 m above surface level at 12 local time (LT = 19 UTC).”

*Lines 218-222: Saying that observed mass concentrations are extremely high and number concentration extremely low is a vague statement. Extreme compared to what? And are they quantities really extremely high/low?*

We replaced “extremely” by “very” and added comparisons and references here:

“The mass concentrations, M<sub>420</sub>, are very low (Fig. 4a), with an average of 0.73 (range 0.11 – 2.3) μg m<sup>-3</sup>, ten times lower than the average PM<sub>2.5</sub> value of 7.3 μg m<sup>-3</sup> for North America (Mortier et al., 2020). The BC, dust, and seasalt concentrations from MERRA-2 are also very low, at 0.041±0.011, 2.9±1.5, and 0.41±0.37 μg m<sup>-3</sup>, respectively, for the measurement period (Supplemental Fig. S2a). In contrast, the particle number concentrations, N<sub>420</sub>, are very high compared to other pristine sites (Andreae, 2009), with an average of 3150 (850 – 10300) cm<sup>-3</sup>, of which a large fraction are in the nucleation mode below 24 nm (average 1100, range 55 – 5250 cm<sup>-3</sup>) (Fig. 4a).”

We did not want to go into a lengthy set of comparisons here, but for example at our Siberian site under clean conditions, mass concentrations are typically two to three times higher. Similar low concentrations to those we measured in BC are seen at the remote rainforest site ATTO in the Amazon only during the very cleanest time in the rainy season.

*Figure 1 is not very helpful in its current form. The names of the locations/places in the maps are barely visible and should be written using larger font sizes. The maps should also include length scales, especially as the scale seems to vary from map to map.*

We recreated these maps with larger fonts and length scales. In addition, we replaced Figs 1b and 1c with land cover maps and included pie charts that represent the land cover types in the fetch areas.
